# Supplementary material
Source: PubMed Central journal article supplement (PMC6112156)
Supplement: NIHMS981015-supplement-supplementary_data.pdf [file NIHMS981015-supplement-supplementary_data.pdf]

Supplementary Figure1. Derivation of iPSCs from controls and *C9ORF72* patients

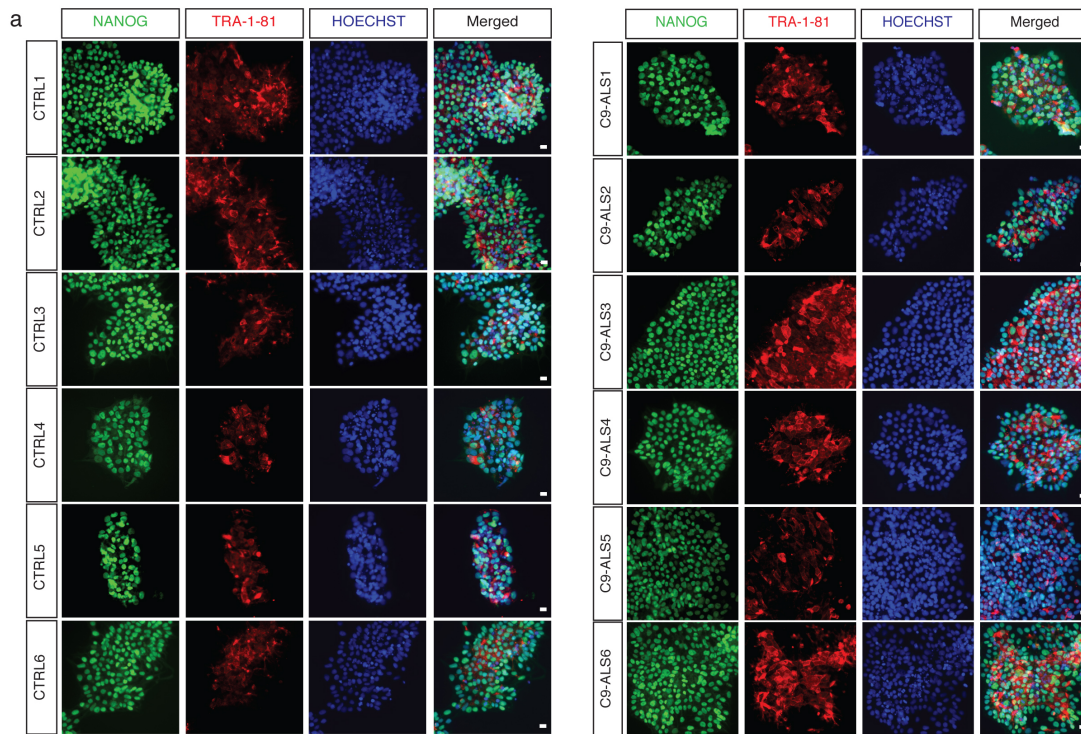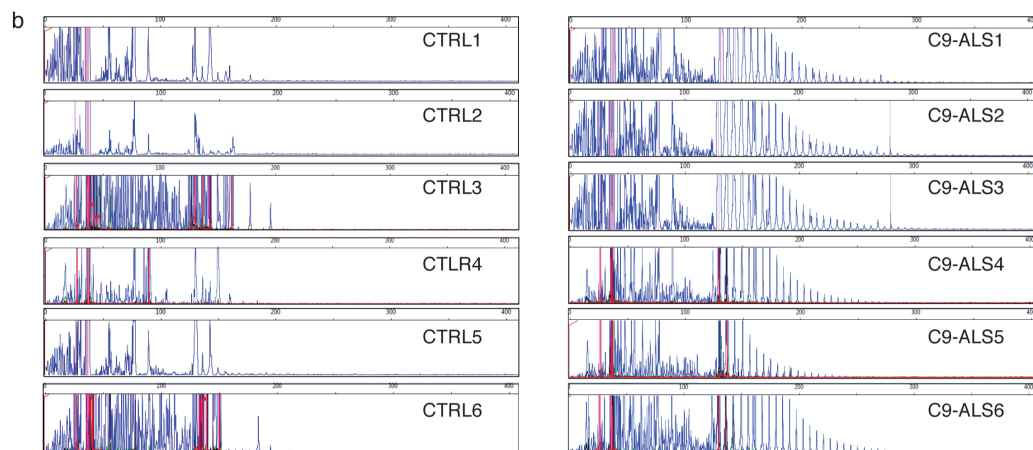

Supplementary Figure 1 (c-f). Derivation of iPSCs from controls and *C9ORF72* patients

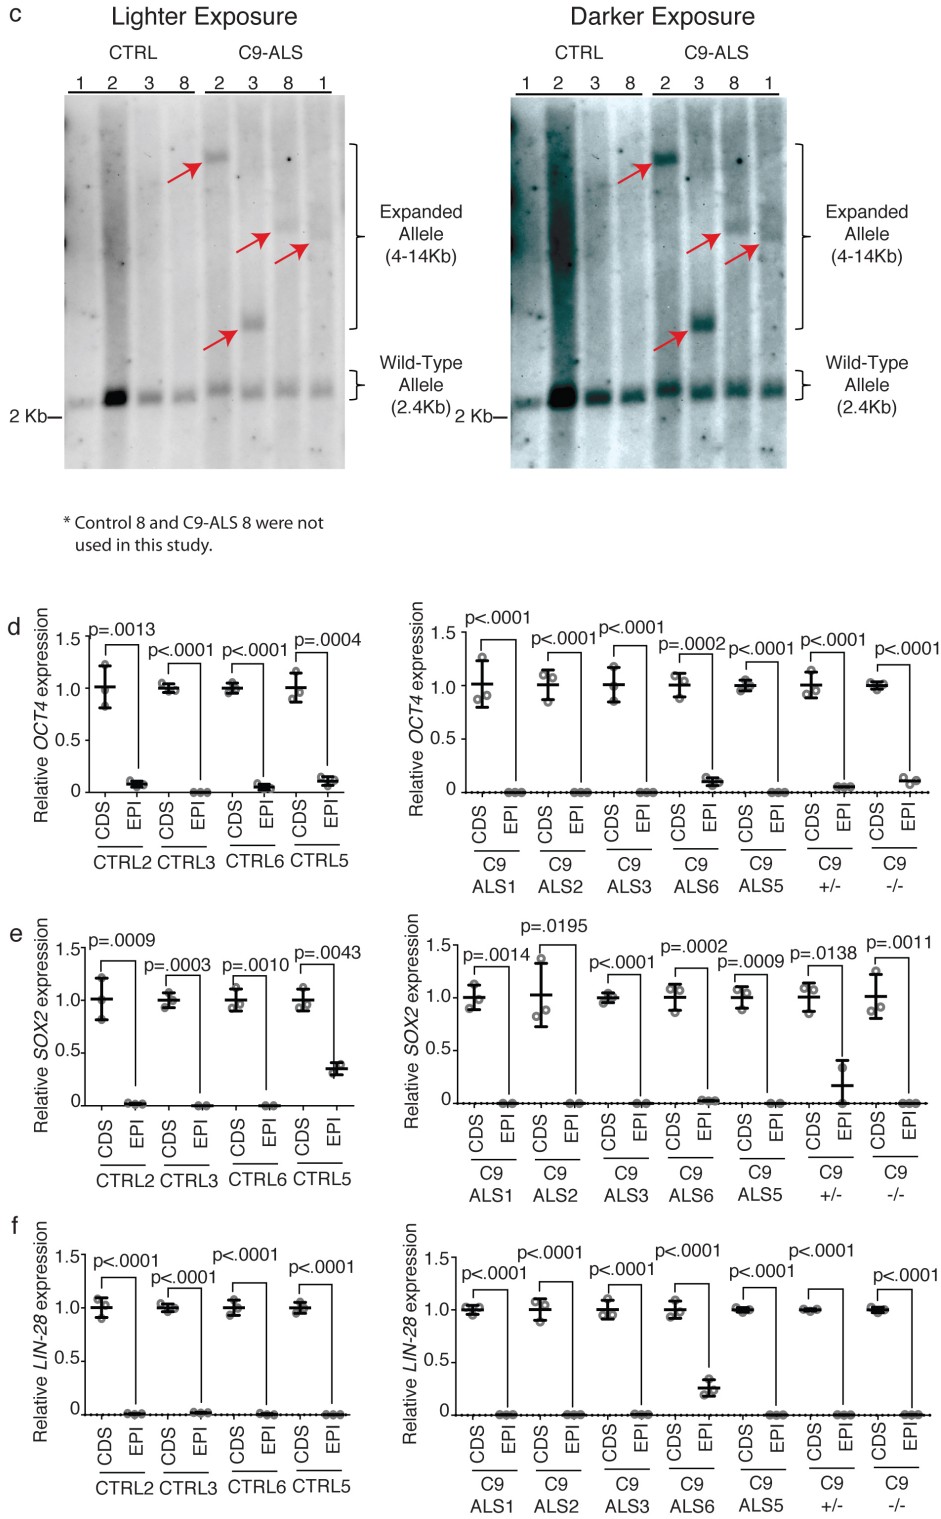

**Supplementary Figure 1**, related to Figure 1. Derivation of iPSCs from Controls and *C9ORF72* Patients. **a**, Control and C9-ALS patient iPSC lines express markers of pluripotency including NANOG (green) and TRA-1-81 (red). Nuclei (blue) are labeled with Hoechst. Scale bars: 40  $\mu$ m. **b**, Repeat-primed PCR (RP-PCR) to quantify the intronic repeats in *C9ORF72* in control (CTRL) and C9-ALS patient iPSC lines. **c**, Southern blot to examine the *C9ORF72* repeat region in control and patient iPSC lines. The wild-type allele gives a single 2.4-kb band, while the presence of an expanded allele gives an additional high molecular weight band (4-14 kb) in all four of the heterozygous patient lines (C9-ALS 1, 2, 3, 8). Red arrows denote the repeat expanded allele. \*Note – Control 8 and C9-ALS 8 were not used in this study. The experiments in (a-c) were repeated twice with similar results. **d-f**, qPCR genotyping to quantify expression of the episomal plasmid iPSC reprogramming constructs in iPSC lines. A representative genefrom each of the 3 reprogramming plasmids was tested (*OCT4* (a), *SOX2* (b), and *LIN28* (c)). CDS refers to the endogenous gene and was PCR amplified using PCR primers specific to the endogenous locus. EPI refers to the episomal gene and was PCR amplified using PCR primers specific to the episomal version. All lines tested had low or undetectable levels of the episomal factors. PCR primers and qPCR assay were designed as described previously<sup>61</sup>. Mean +/- s.d. Two-tailed t-test between the CDS and EPI levels for each gene for each line. n=3 biologically independent iPSC cultures per line for each gene evaluated.

Supplementary Figure 2. Generation of functional motor neurons from *C9ORF72* patients

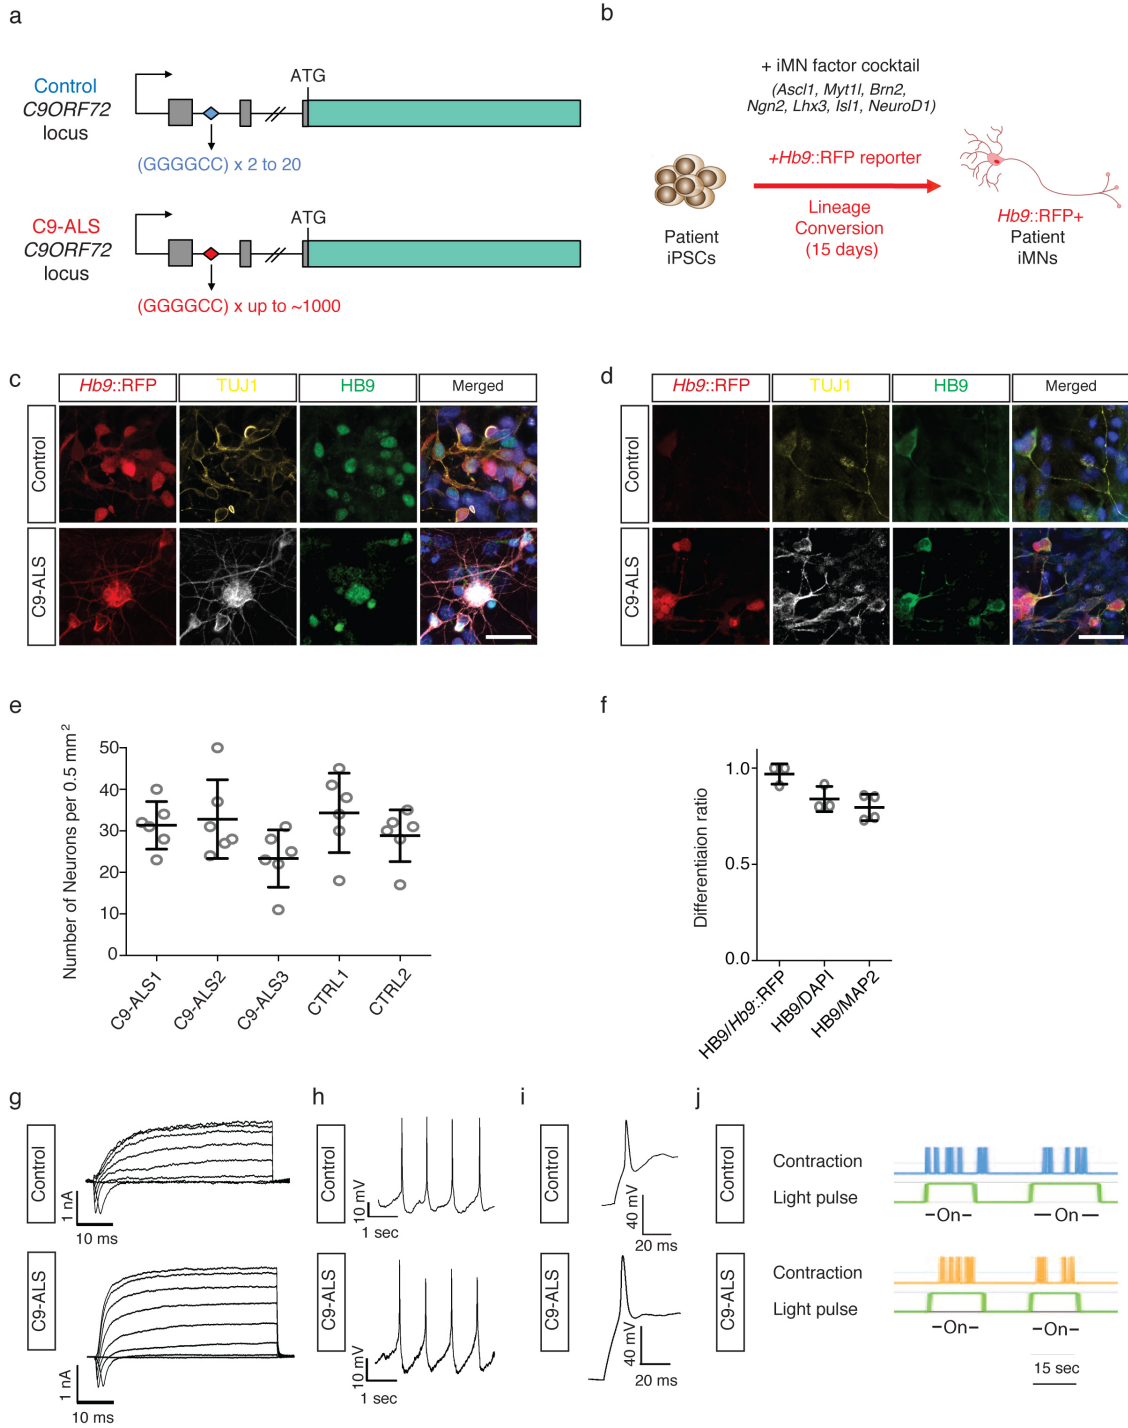

**Supplementary Figure 2**, related to Figure 1. Generation of Functional Motor Neurons From Controls and *C9ORF72* Patients. **a**, The *C9ORF72* locus in healthy controls and *C9ORF72*-ALS (C9-ALS) patients. **b**, Conversion of patient iPSCs into iMNs. iPSC, induced pluripotent stem cell; iMN, induced motor neuron. **c–d**, Immunocytochemistry shows iMNs express the *Hb9*::RFP reporter (red, **c, d**), TUJ1 (yellow, **c, d**), HB9 (green, **c**) and vesicular acetylcholine transporter (VACHT) (green, **d**). Nuclei (blue) are labeled with Hoechst. Scale bars: 125  $\mu$ m. These experiments were repeated twice with similar results. **e**, Number of control and C9-ALS iMNs generated per 0.5 mm<sup>2</sup> of culture dish area. Mean  $\pm$  s.d. n=6 biologically independent iMN conversions per line. **f**, Quantification of iMN generation, showing the amount of HB9+ cells as a proportion of *HB9*::RFP+ cells, or of DAPI-staining nuclei, or of MAP2+ cells. Mean  $\pm$  s.d. n=3 (for HB9/*Hb9*::RFP and HB9/DAPI) or 4 (HB9/MAP2) biologically independent iMN conversions. **g–i**, Sample patch clamp recordings showing that iMNs possess functional sodium and potassium channels (**g**) and fire action potentials spontaneously (**h**) or in response to a current injection (**i**). These experiments were repeated twice on biologically independent iMN conversions with similar results. **j**, Channel rhodopsin-transduced iMNs actuate contractions of primary chick embryonic muscle (top) in response to light (bottom).

Supplementary figure 3 a-f. C9ORF72 iMNs Display Neurodegenerative Phenotypes

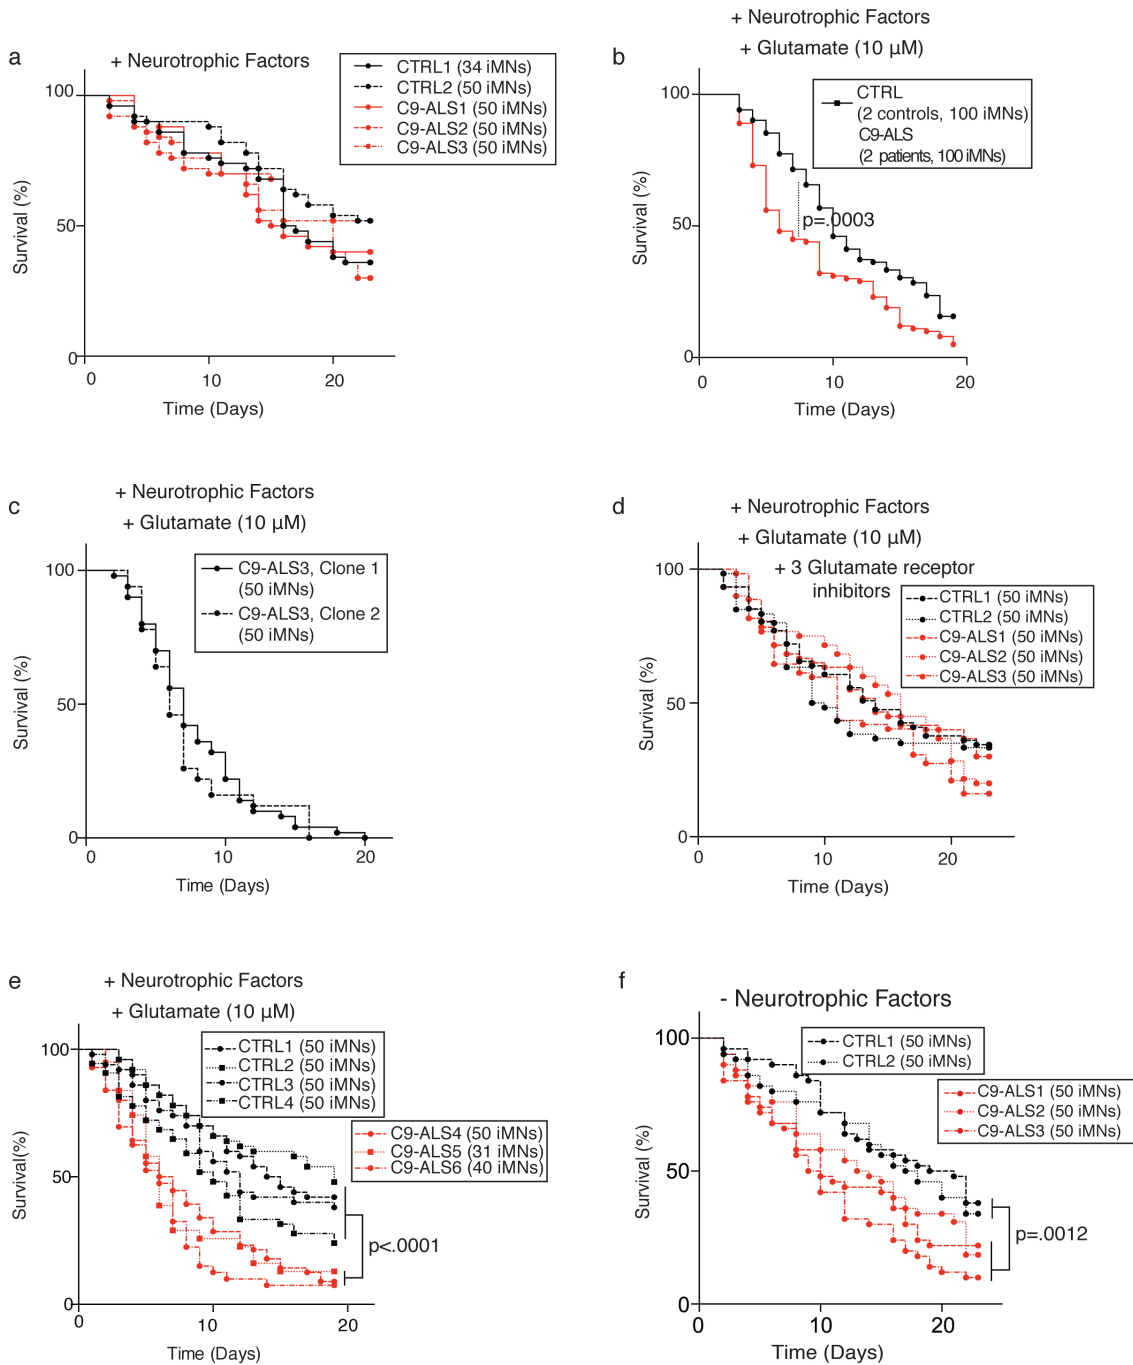

Supplementary figure 3 g-l. C9ORF72 iMNs Display Neurodegenerative Phenotypes

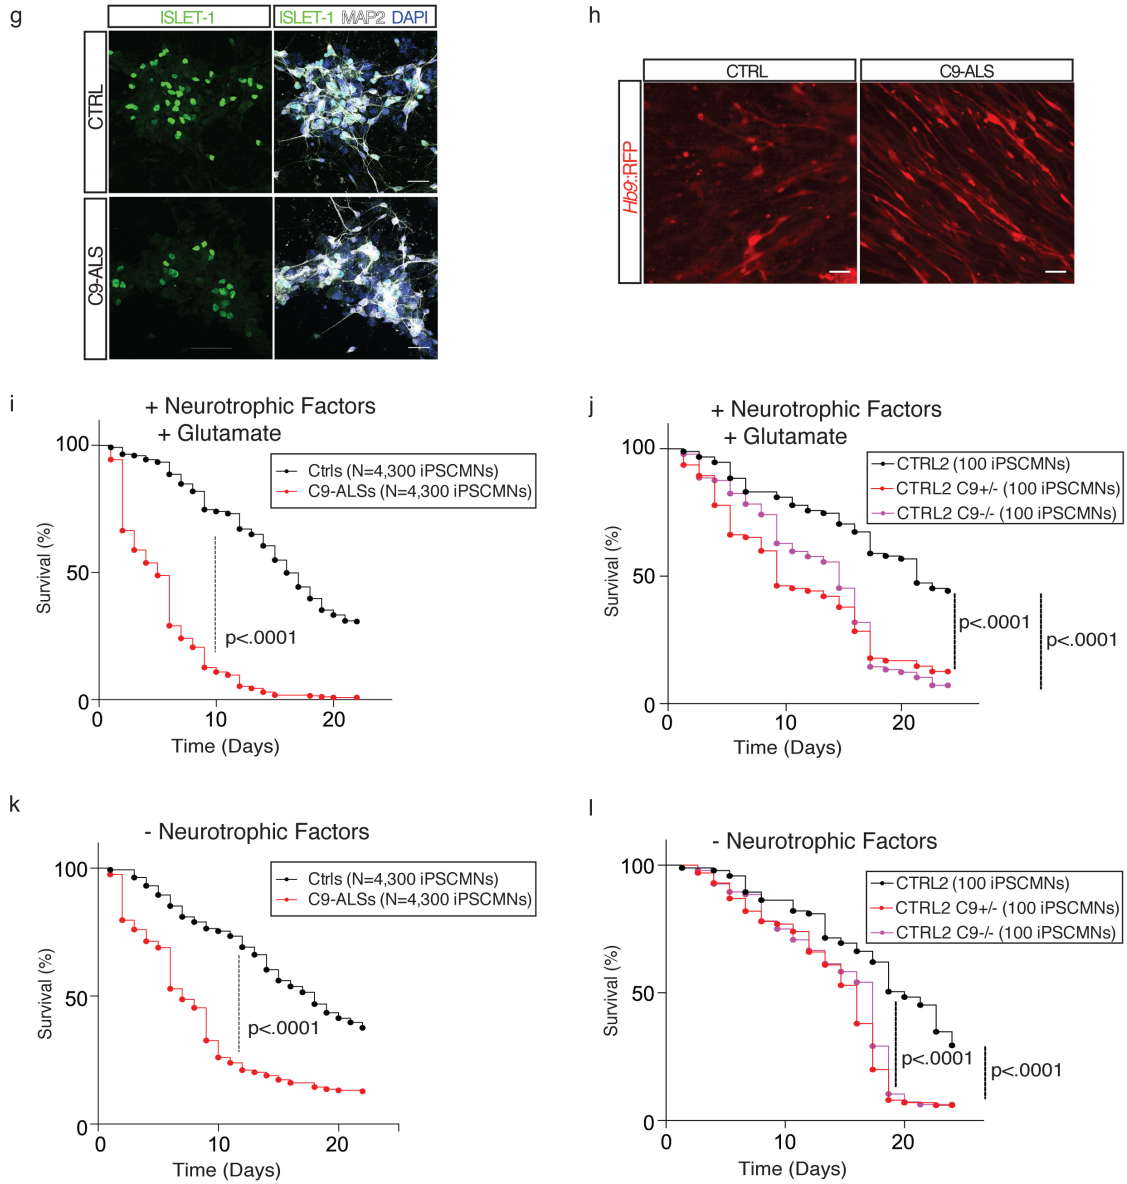

Supplementary figure 3m to o. C9ORF72 iMNs Display Neurodegenerative Phenotypes

m

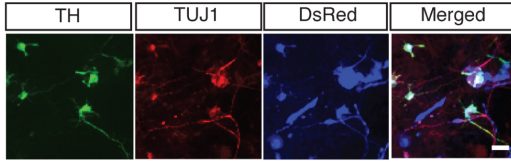

n

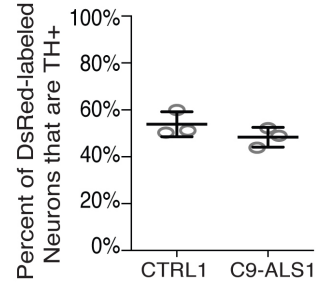

o

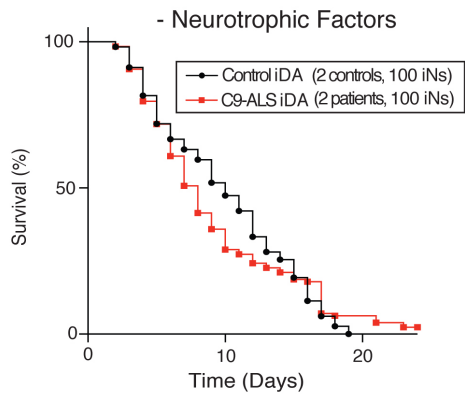



**Supplementary Figure 3**, related to Figures 1 and 2. *C9ORF72* iMNs Display Neurodegenerative Phenotypes. **a-f**, Representative survival curves of control and C9-ALS iMNs with neurotrophic factors (survival curves for individual lines shown) plus excess glutamate (a-c, e), with the live imaging performed in a Biostation CT for (a, d, e, f) and a Molecular Devices ImageExpress for (b) and (c), with glutamate receptor antagonists (3I) (d), or without neurotrophic factors (f). iMNs from two independent clones of the same donor (C9-ALS3) gave consistent results in this assay (c). iMN survival curves for individual lines cultured in excess glutamate with glutamate receptor antagonists are shown (d). iMN survival curves for individual lines (including additional lines not included in Figure 1) cultured in excess glutamate (e). iMN survival curves for individual lines included in Figure 1, cultured without neurotrophic factors are shown (f). For (a), n=50 iMNs per line quantified from 3 biologically independent iMN conversions. For (b), n=50 iMNs per line quantified from 2 control or 2 C9-ALS lines and from 3 3 biologically independent iMN conversions per line. For (c) n=50 iMNs per line quantified from 3 biologically independent iMN conversions per line. For (d), n=50 iMNs per line quantified from 3 biologically independent iMN conversions per line. For (e), n=50 iMNs per control line, or 50, 31, or 40 iMNs per C9-ALS line quantified from 3 biologically independent iMN conversions per line. For (f), n=50 iMNs per line quantified from 3 biologically independent iMN conversions per line. **g**, ISL1+/MAP2+ iPSC-derived motor neurons generated using retinoic acid and purmorphamine. Scale bar: 30  $\mu$ m. This experiment was performed 3 times with similar results. **h**, Control and C9-ALS iPSC-derived motor neurons labeled with the lentiviral *Hb9::RFP* reporter. This experiment was performed 3 times with similar results. Scale bar: 30  $\mu$ m. **i-j**, Survival curves for motor neurons derived from iPSCs using soluble morphogens and cultured in excess glutamate. Survival curves of neurons from 4 controls and 4 C9-ALS patients (i) or from control and *C9ORF72*<sup>+/-</sup> iPSCs (j) are shown in aggregate. For (i), n=1075 motor neurons quantified from 4 lines per genotype and 3 biologically independent motor neuron cultures per line. For (j), n=100 motor neurons per line quantified from 3 biologically independent motor neuron cultures per line. **k-l**, Survival curves for motor neurons derived from iPSCs using soluble morphogens and cultured without neurotrophic factors. Survival curves of neurons from 4 controls and 4 C9-ALS patients (k) or from control and *C9ORF72*<sup>+/-</sup> iPSCs (l) are shown in aggregate. For (k), n=1075 motor neurons quantified from 4 lines per genotype and 3 biologically independent motor neuron cultures per line. For (l), n=100 motor neurons per line quantified from 3 biologically independent motor neuron cultures per line. **m**, Generation of TH+ dopaminergic neurons from control and *C9ORF72* patients. The induced neurons express the DA neuron marker tyrosine dehydroxylase (TH, green), as well as the neuronal marker TUJ1 (red) and DsRed (blue, co-infected with the iDA factors to mark transduced cells). Scale bar: 10  $\mu$ m. This experiment was performed twice with similar results. **n**, The percentage of DsRed-labeled cells that express TH is comparable between control and C9-ALS genotypes. Mean  $\pm$  s.e.m. n=3 biologically independent iDA neuron conversions, 32 cells quantified per conversions, two-tailed t-test). **o**, Survival of induced TH+ (iDA) neurons in excess glutamate. n=50 iDA neurons per line, 2 lines per genotype and 3 biologically independent iDA neuron conversions per line. All iMN survival experiments were statistically analyzed using a two-sided log-rank test. iMN survival experiments in (**a**, **d**, **e**, and **f**) were performed in a Nikon Biostation, and (**b**, **c**, **i-l**, and **o**) were performed in a

Molecular Devices ImageExpress. For iMN survival experiments, if iMNs from more than one iPSC line were combined into one curve to improve clarity, the number of iPSC lines is indicated in the legend.

Supplementary Figure 4a-d. C9ORF72 Levels Modulate iMN Survival

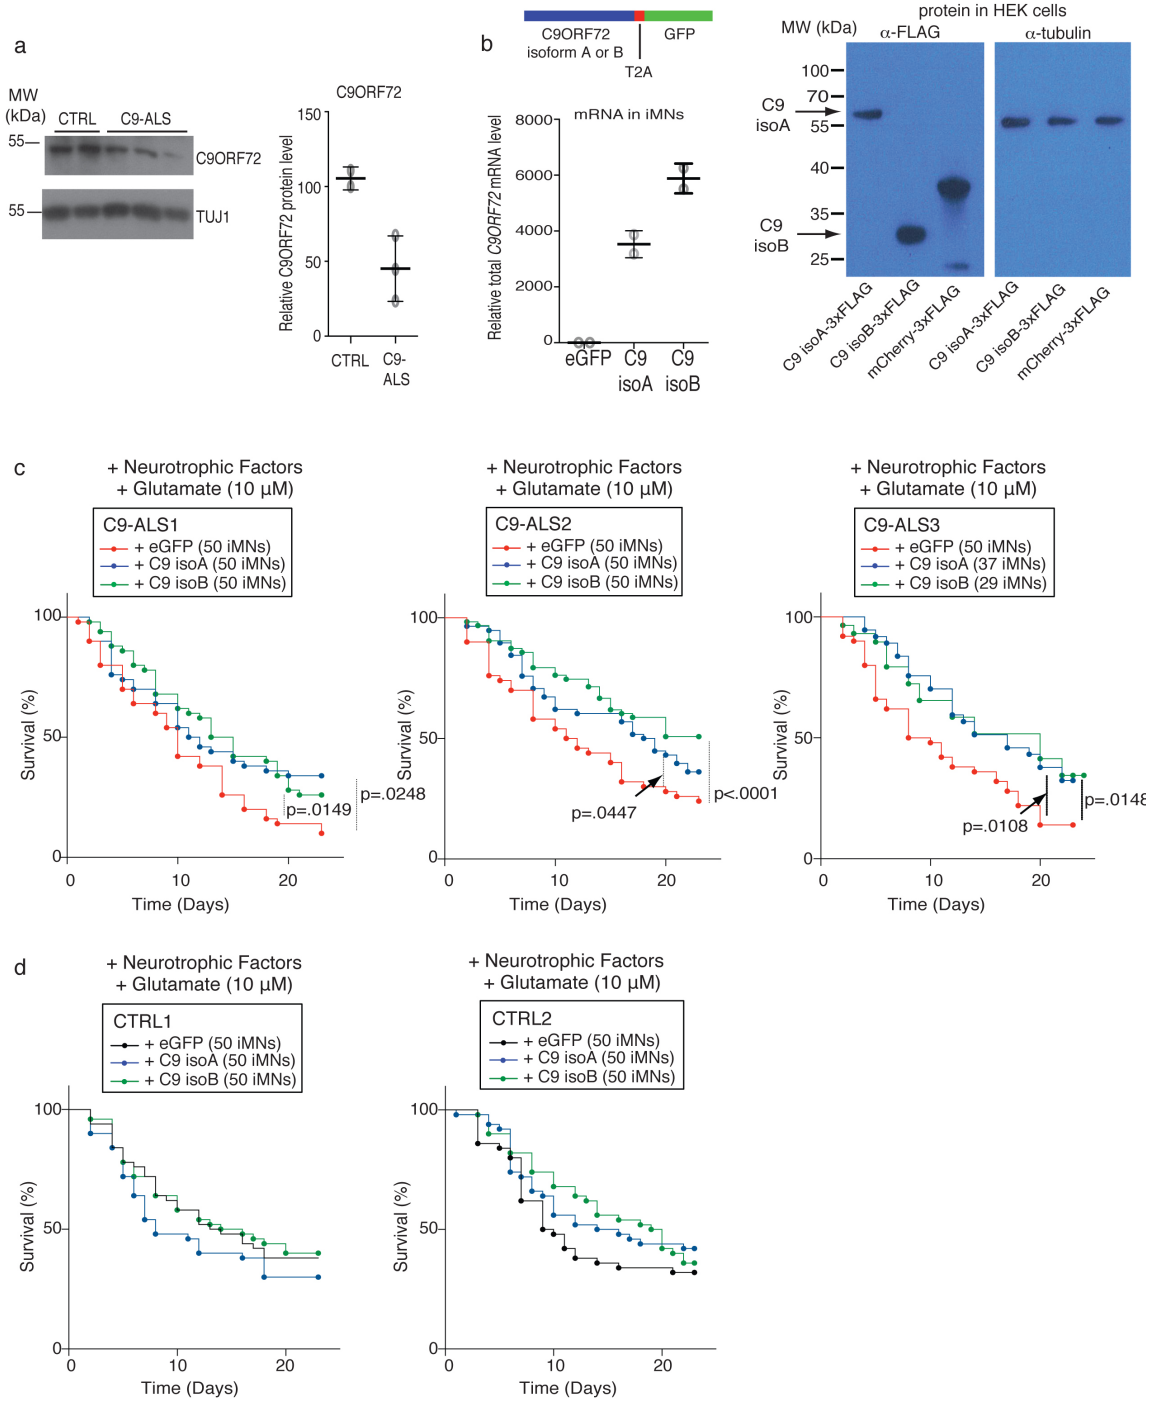

Supplementary Figure 4 e-i. C9ORF72 Levels Modulate iMN Survival

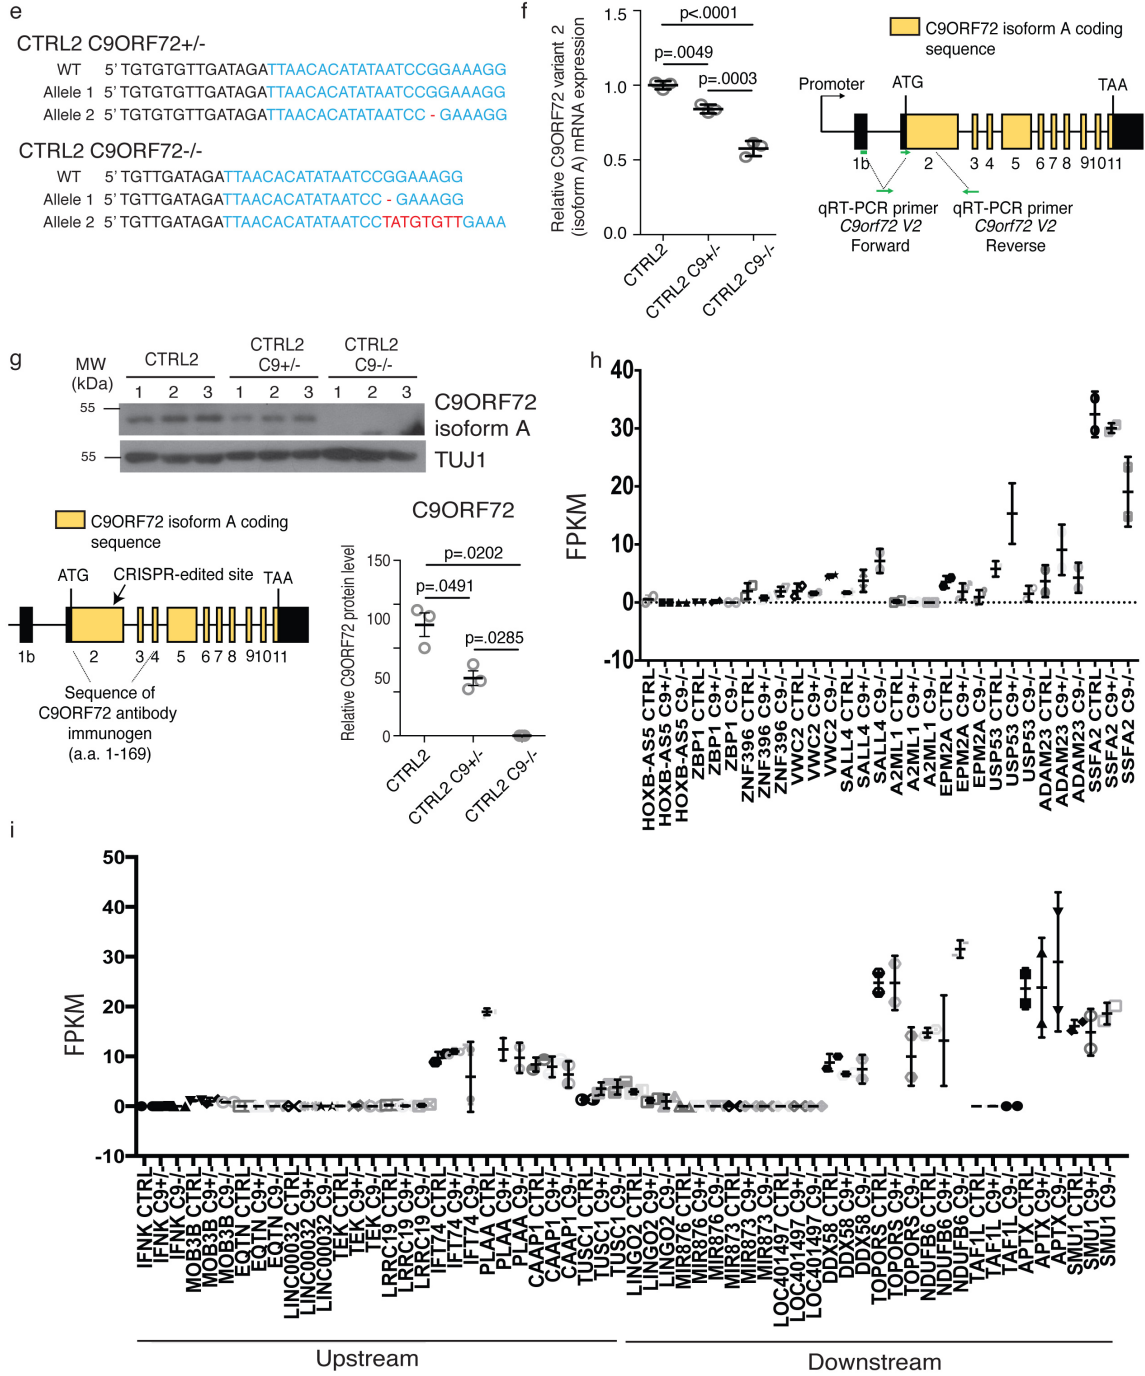

Supplementary Figure 4j to I. C9ORF72 Levels Modulate iMN Survival

j

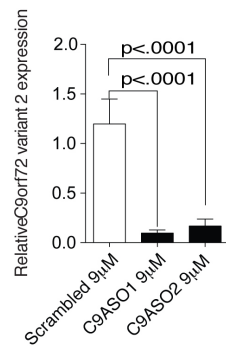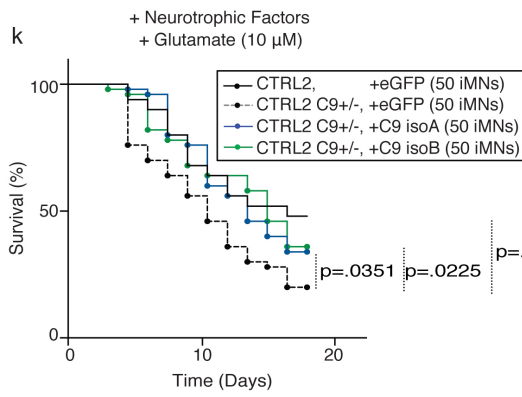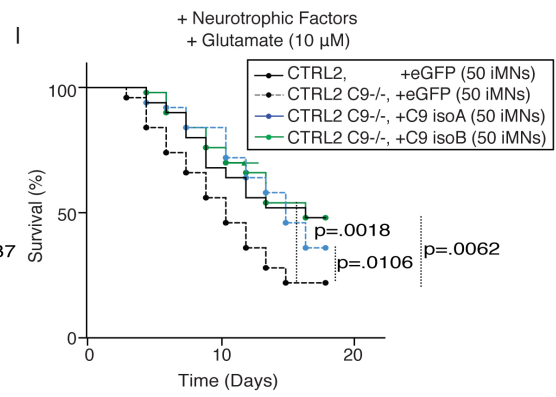

**Supplementary Figure 4**, related to Figure 2. C9ORF72 Levels Modulate iMN Survival. **a**, Western blot and quantification of C9ORF72 isoform A levels in control (n=2) and patient (n=3) motor neurons. Mean +/- s.d. **b**, Retroviral construct used in overexpression studies, *C9ORF72* mRNA expression levels (relative to *GAPDH*) in patient iMNs overexpressing eGFP or C9ORF72 (isoform A or B) and western blot verification of C9ORF72 protein production from retroviral constructs encoding an N-terminal FLAG-tagged version of C9ORF72 isoform A or B (to confirm specific detection of C9ORF72 protein) upon transduction into HEK cells. Full blots shown. qRT-PCR: Mean± s.e.m. n = 3 biologically independent iMN conversions per condition. **c-d**, Survival of iMNs in excess glutamate, either with C9ORF72 (isoform A or B) or eGFP overexpression. Expression of exogenous C9ORF72 does not enhance control iMN survival (2 independent lines shown) (**d**), but rescues the survival of C9-ALS2 iMNs (3 independent lines shown)(**c**). n=50 iMNs per condition except for C9-ALS3, where n=50, 37, and 29 iMNs for +GFP, +isoA, and +isoB, respectively. iMNs were quantified from 3 biologically independent iMN conversions. **e**, Sanger sequencing results of exon 2 of CRISPR/Cas9-mutated subclones of the CTRL2 iPSC line, verifying frameshift mutations. **f**, qRT-PCR analysis of the levels of *C9ORF72* variant 2 in control, *C9ORF72*<sup>+/-</sup>, and *C9ORF72*<sup>-/-</sup> flow-sorted iMNs. The diagram depicts the qRT-PCR primer binding sites and the coding sequence for C9ORF72 isoform A. n=3 biologically independent iMN conversions per line. Mean +/- s.d. One-way ANOVA with Tukey correction. F-value (DFn, DFd): (2, 6) = 97.97. n=3 biologically independent motor neuron differentiations per line. **g**, Western blot analysis of C9ORF72 isoform A levels in motor neurons derived from control (CTRL2), *C9ORF72*<sup>+/-</sup>, and *C9ORF72*<sup>-/-</sup> iPSCs. Quantification performed on n=3 biologically independent motor neuron differentiations for each genotype in the western blot, one-way ANOVA with Tukey correction for all comparisons. F-value (DFn, DFd): (1.528, 3.055) = 67.78. Mean +/- s.e.m. The CRISPR/Cas9 gene-edited site and the peptide sequence of C9ORF72 (aa 1-169) that was used to generate the C9ORF72 antibody (Proteintech) are shown. **h-i**, RNA-sequencing (RNA-seq) analysis of iMNs of the starting control genotype (CTRL2) and isogenic *C9ORF72* mutants (*C9*<sup>+/-</sup>, heterozygous; *C9*<sup>-/-</sup>, homozygous) generated using CRISPR/Cas9. No significant changes in gene expression are observed in the top 10 genes predicted to have possible off-target sites for the sgRNAs used (h). Likewise, expression of most genes immediately upstream or downstream of *C9ORF72* (10 genes in either direction) are not altered in the mutants (i). Values are the mean of 2 biologically independent iMN conversions. Mean ± s.d. (h, i). FPKM, fragments of kilobase of exon per million fragments mapped; n.s., not significant. **j**, qRT-PCR analysis of iMN cultures treated with a scrambled ASO or ASOs targeting *C9ORF72*. Graphs show the mean of 3 biological replicates ± s.e.m. n=3 biologically independent iMN conversions per condition. One-way ANOVA with Tukey correction for all comparisons. F-value (DFn, DFd): (2, 14) = 19.62. **k-l**, Survival of iMNs in excess glutamate, either with C9ORF72 (isoform A or B) or eGFP overexpression. Expression of exogenous C9ORF72 rescues the survival of CTRL2 iMNs with C9 mutations: CTRL2 *C9ORF72*<sup>+/-</sup> (**k**) and CTRL2 *C9ORF72*<sup>-/-</sup> (**l**). n=50 iMNs per condition quantified from 3 biologically independent iMN conversions. All iMN survival statistical analysis was performed using a two-sided log-rank test. iMN survival experiments in (**c and d**) were performed in a Nikon Biostation, and (**k and l**) were performed in a Molecular Devices ImageExpress.

Supplementary Figure 5. Full scans of blots for all figures in which the full blot was not shown

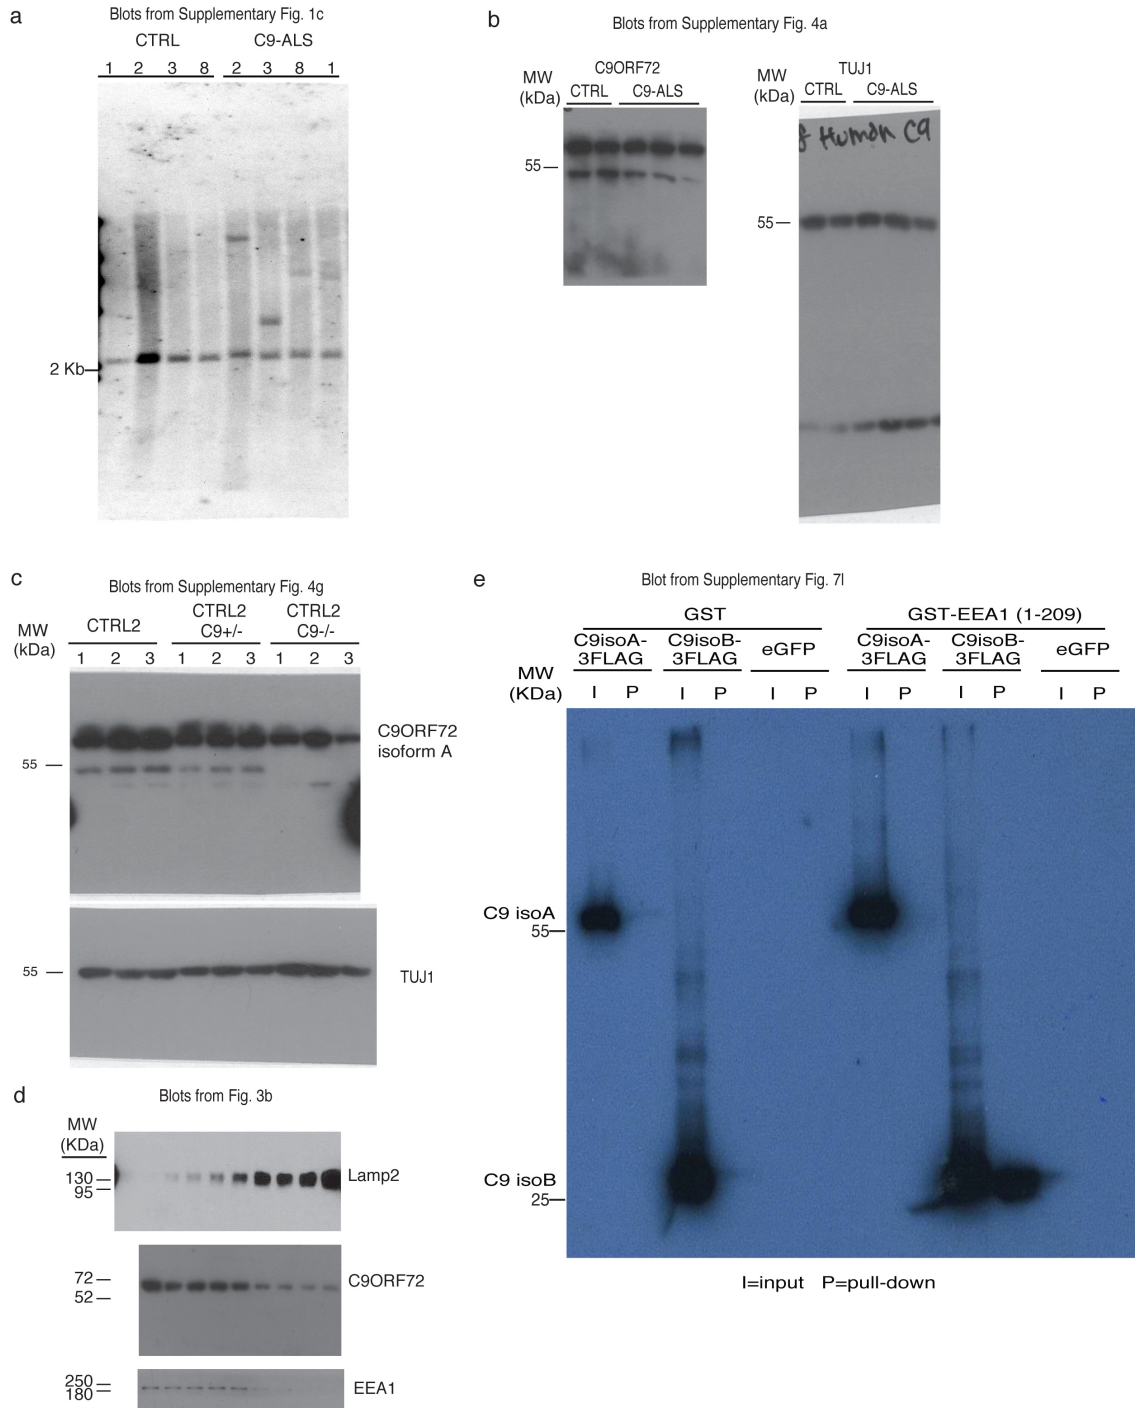

Supplementary Figure 5. Full scans of blots for all figures in which the full blot was not shown

f

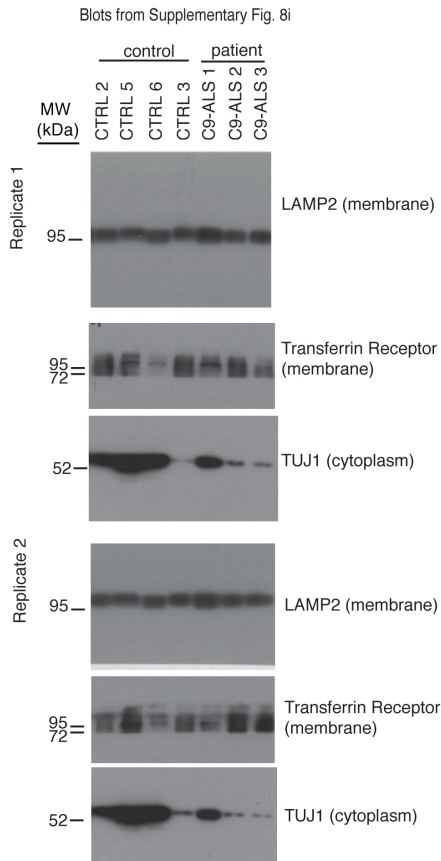

g

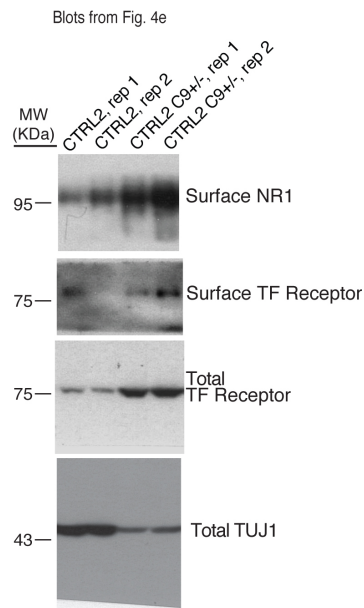

h

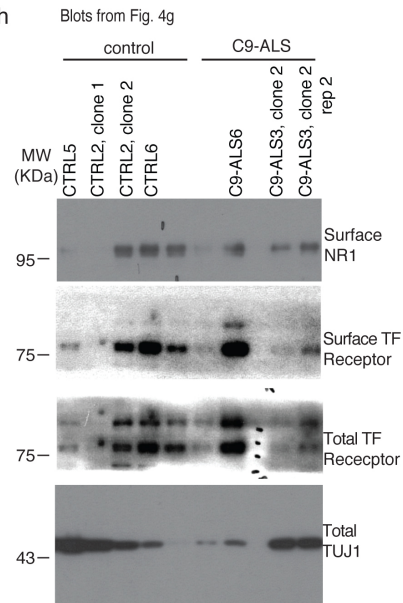



Supplementary Figure 5. Full scans of blots for all figures in which the full blot was not shown

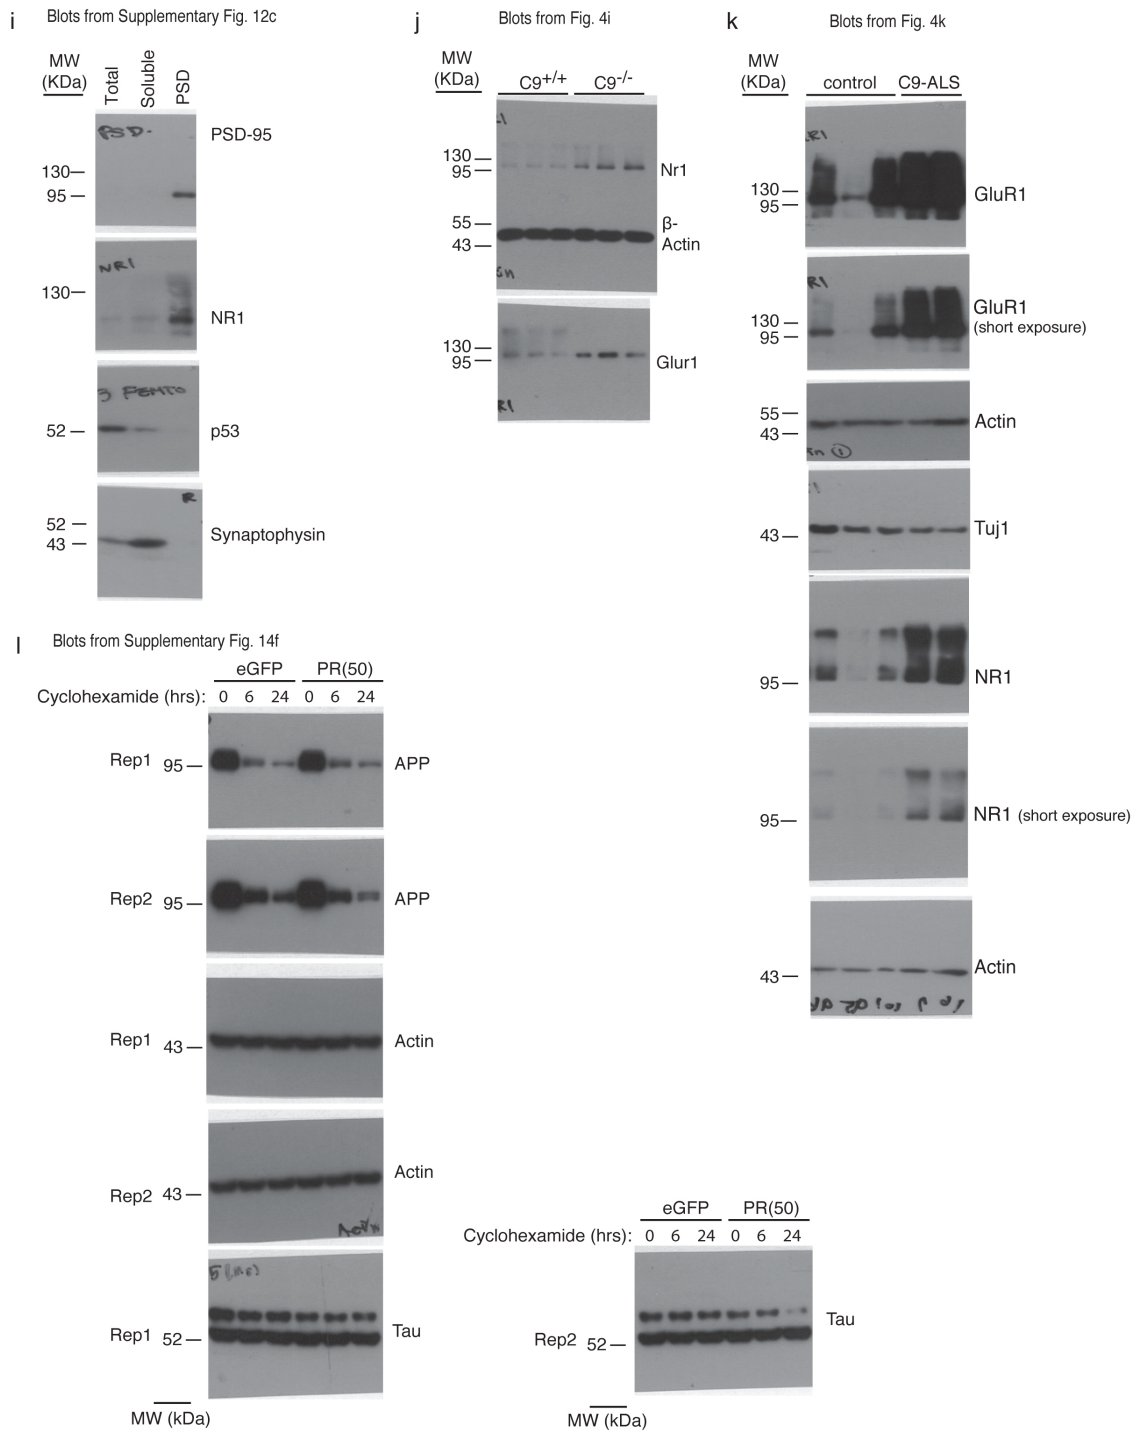

**Supplementary Data Figure 5**, related to Multiple Figures. Full Scans of Blots for Figures in Which the Full Blot Was Not Shown. Blots for the following figures are shown: **a**, Supplementary Fig. 1c, **b**, Supplementary Fig. 4a, **c**, Supplementary Fig. 4g, **d**, Fig. 3b, **e**, Supplementary Fig. 7l, **f**, Supplementary Fig. 8i, **g**, Fig. 4e, **h**, Fig. 4g, **i**, Supplementary Fig. 12c, **j**, Fig. 4i, **k**, Fig. 4k, **l**, Supplementary Fig. 14f.

Supplementary Figure 6. Gene expression analysis of *C9ORF72* postmortem and *C9ORF72* patient and *C9ORF72*<sup>+/-</sup> iMN samples.

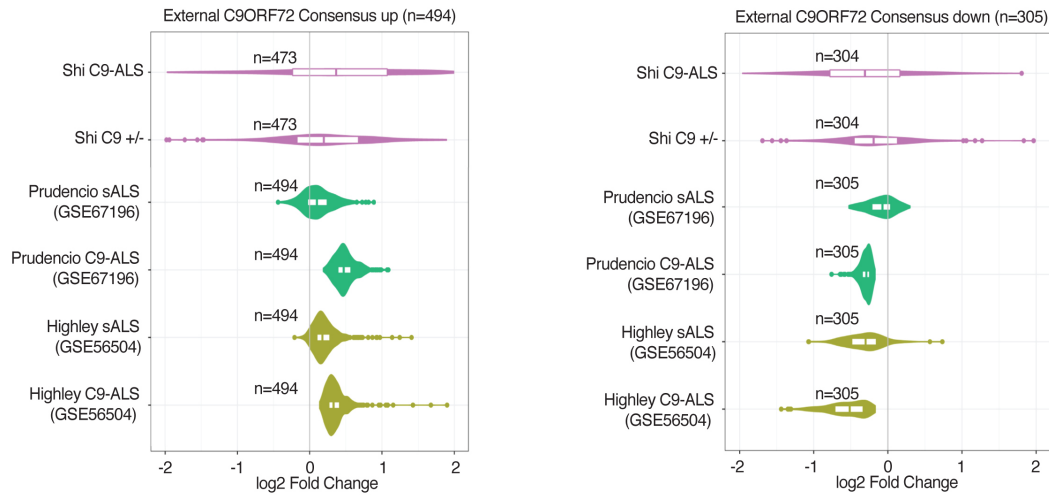

**Supplementary Figure 6**, related to Figure 2. Gene expression analysis of *C9ORF72* postmortem and *C9ORF72* patient and *C9ORF72*<sup>+/-</sup> iMN samples. The samples used were iMNs from control iMNs, *C9ORF72* ALS patient iMNs, and *C9ORF72*<sup>+/-</sup> iMNs, frontal cortex from *C9ORF72* and sporadic ALS patients (GSE67196), and LCM motor neurons from *C9ORF72* and sporadic ALS patients (GSE56504). Sporadic patient data is included as a reference. n=number of consensus genes analyzed, which were identified by DESeq2 analysis as being significantly differentially expressed (p<.05) in all postmortem *C9ORF72* patient datasets. Sample numbers: iMNs, this study: N=2 biologically independent iMN conversions each for control, *C9ORF72*<sup>+/-</sup> and *C9ORF72*<sup>-/-</sup>. GSE67196: N=9 healthy controls, 8 *C9ORF72* patients, 11 sporadic ALS patients. GSE56504: N=6 healthy controls, 3 *C9ORF72* patients, 3 sporadic ALS patients.

Supplementary Figure 7 (a-e). Super-Resolution Microscopy to Determine C9ORF72 Localization in iMNs

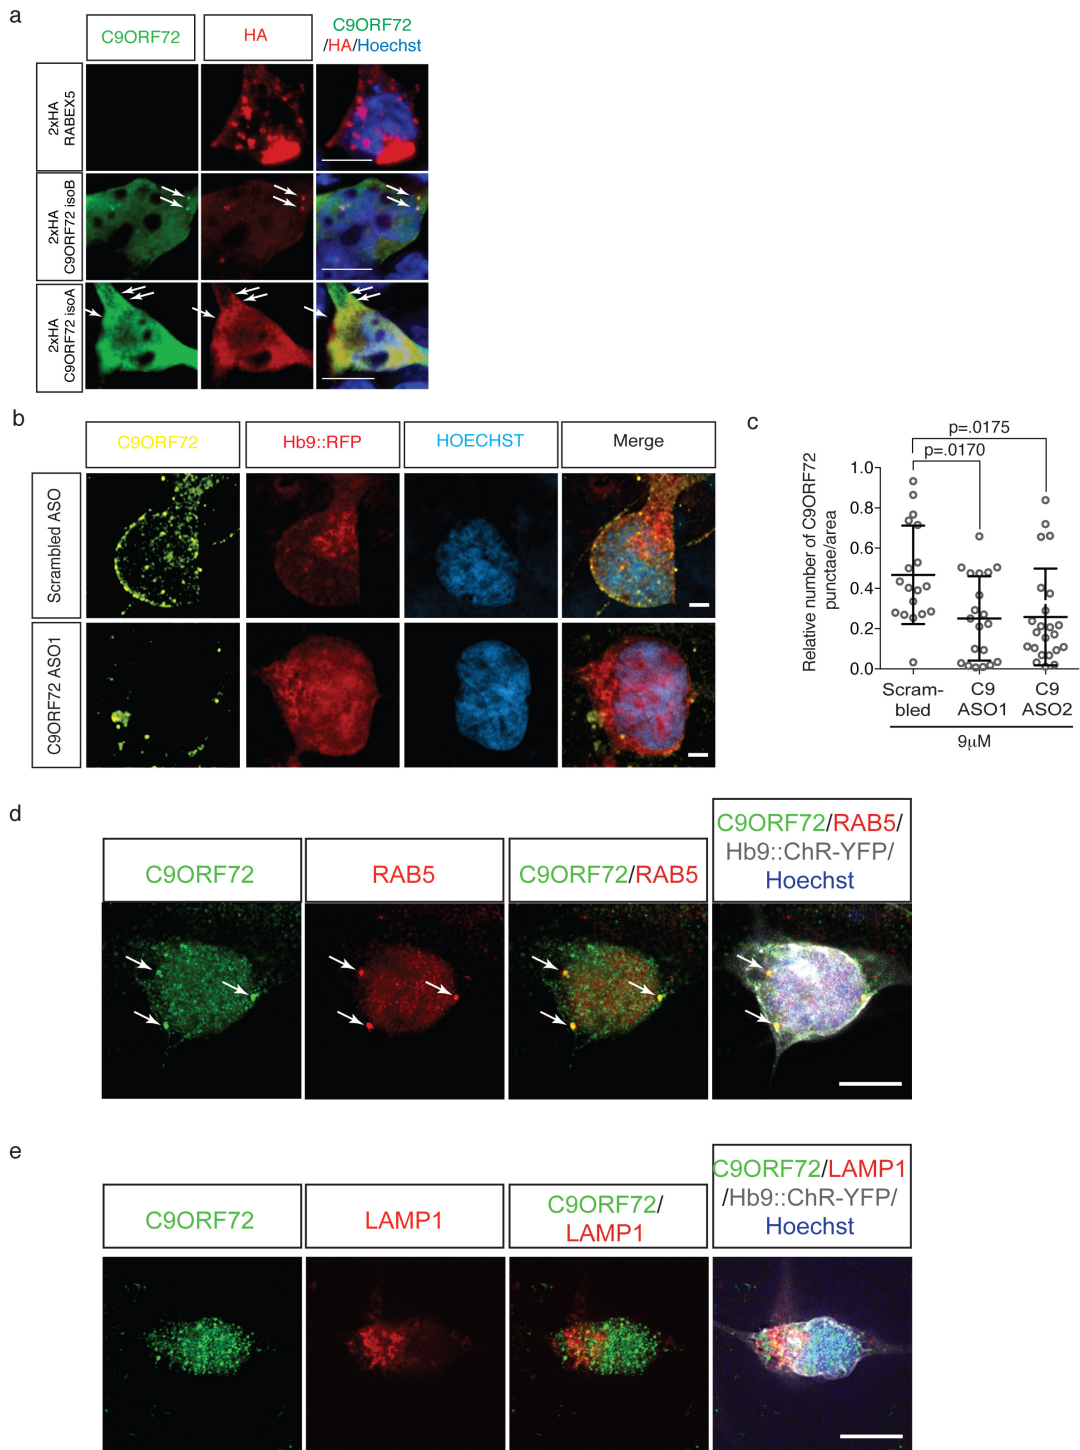

Supplementary Figure 7 (f-k). Super-Resolution Microscopy to Determine C9ORF72 Localization in iMNs

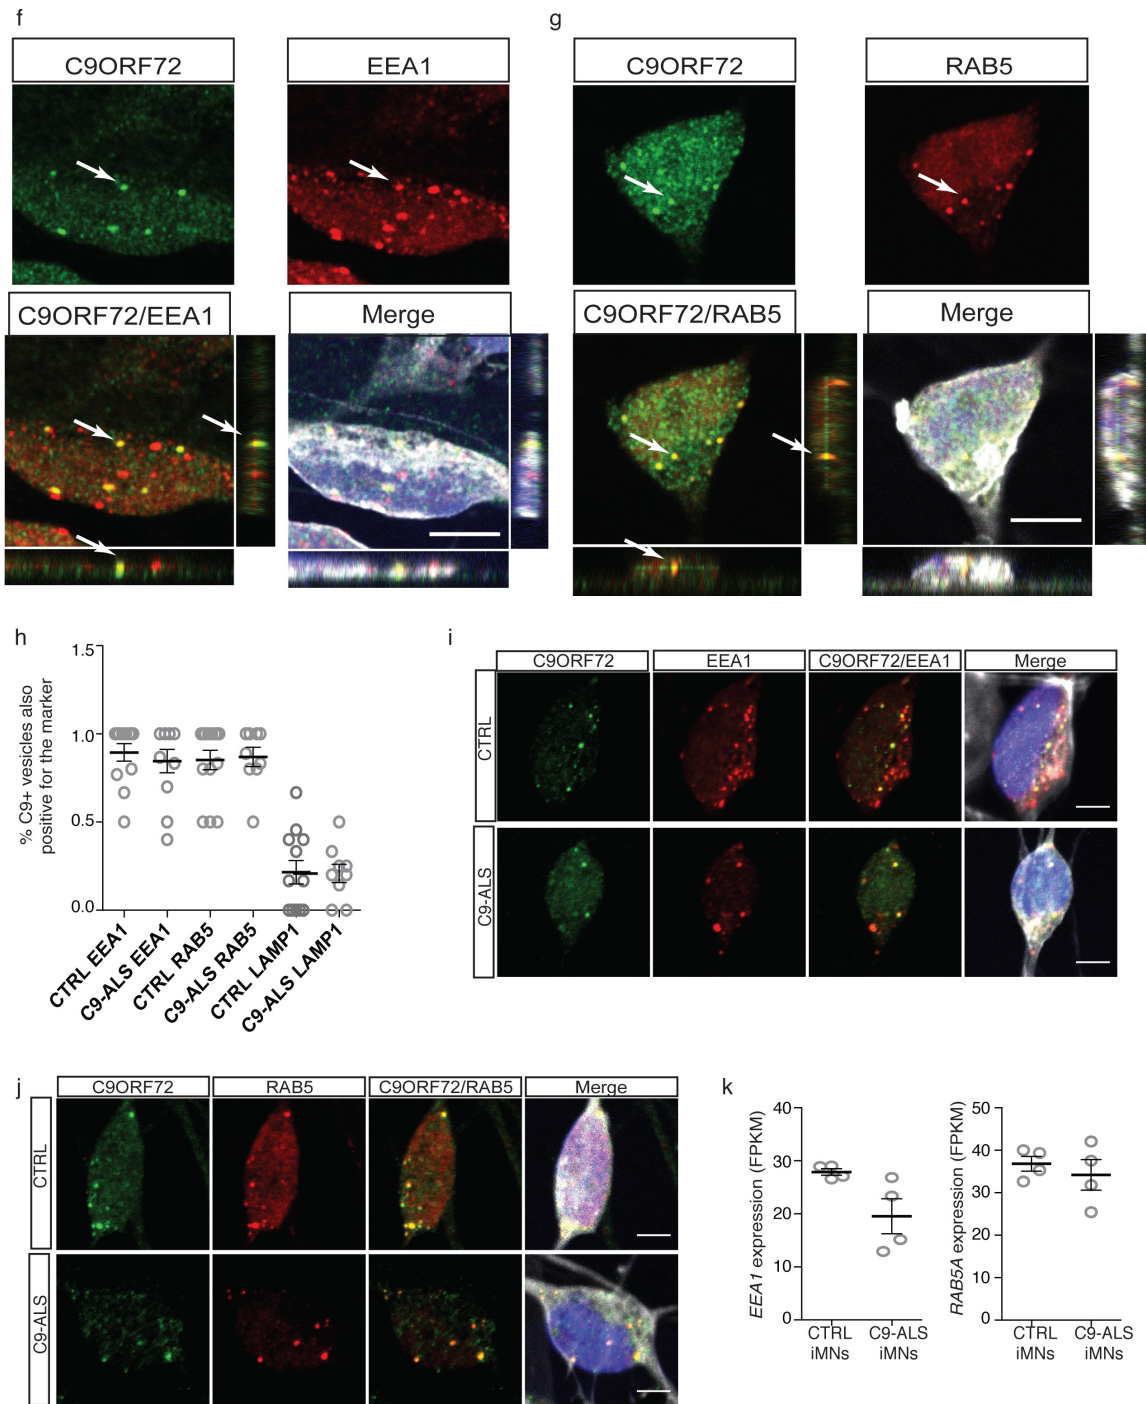

Supplementary Figure 7 (I). Super-Resolution Microscopy to Determine C9ORF72 Localization in iMNs

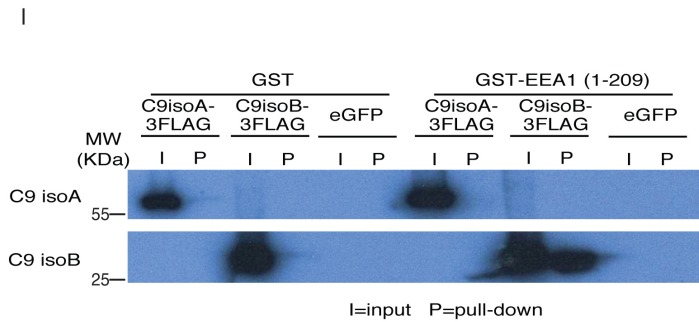

**Supplementary Figure 7**, related to Figure 3. Super-resolution Microscopy to Determine C9ORF72 Localization in iMNs. **a**, Confocal images of HEK293T-overexpressing HA-tagged RABEX5 or C9ORF72 (isoform A or B), showing the expression of the exogenous protein; HA (red) and C9ORF72 (green). Nuclei (blue) are labeled with Hoechst. White arrows denote areas of overlap between anti-C9ORF72 and anti-HA immunostaining. Scale bars: 10  $\mu$ m **b**, Confocal images and **c**, quantification of C9ORF72+ puncta in iMNs treated with scrambled or C9ORF72-targeting ASOs. One way-ANOVA with Tukey correction across all comparisons F-value (DFn, DFd): (2, 58) = 5.322. n= 18, 20, 24 iMNs quantified from two biologically independent iMN conversions in the scrambled ASO, C9ORF72 ASO1, and C9ORF72 ASO2 conditions, respectively. Mean +/- s.d. Scale bars: 2  $\mu$ m. **d-e**, Super-resolution microscopy images of control iMNs which express *Hb9::ChR-YFP* and show colocalization (arrows) of C9ORF72 (green) with RAB5 (**d**, red) but not with the lysosomal marker LAMP1 (**e**, red). Scale bars: 5  $\mu$ m **f-g**, Confocal Z-axis scanning to determine C9ORF72 localization. C9ORF72 (green) colocalizes with EEA1 (**f**, red) and RAB5 (**g**, red) in 3-dimensional space. Nuclei are labeled with DAPI (blue). Scale bars: 5  $\mu$ m. **h**, Quantification of the percent of C9ORF72<sup>+</sup> vesicles also labeled with various vesicle markers in control and C9-ALS iMNs. n=12 control iMNs and 11 C9-ALS iMNs (C9/EEA1), 14 control iMNs and 9 C9-ALS iMNs (C9/RAB5), and 12 control iMNs and 9 C9-ALS iMNs (C9/LAMP1) quantified from two biologically independent iMN conversions. Mean +/- s.e.m. **i-j**, Representative pictures showing the localization of EEA1<sup>+</sup> (**i**) and RAB5<sup>+</sup> (**j**) vesicles in control and patient iMNs. Scale bars: 5  $\mu$ m. **k**, mRNA expression of *EEA1* and *RAB5A* in flow-purified control and C9-ALS iMNs. n=4 biologically independent iMN conversions per genotype. Mean +/- s.e.m. **l**, Western blot analysis of a pull-down experiment to examine the potentials of C9ORF72 isoform A and B to bind to an immobilized N-terminal fragment of EEA1. I = input, P = pull-down. The blot was probed with an anti-FLAG antibody. All immunostaining and immunoblotting assays were performed and quantified using 2 biological replicates/individual differentiations.

Supp. Figure 8(a-h). Reduced C9ORF72 activity disrupts vesicle trafficking and lysosomal biogenesis in iMNs

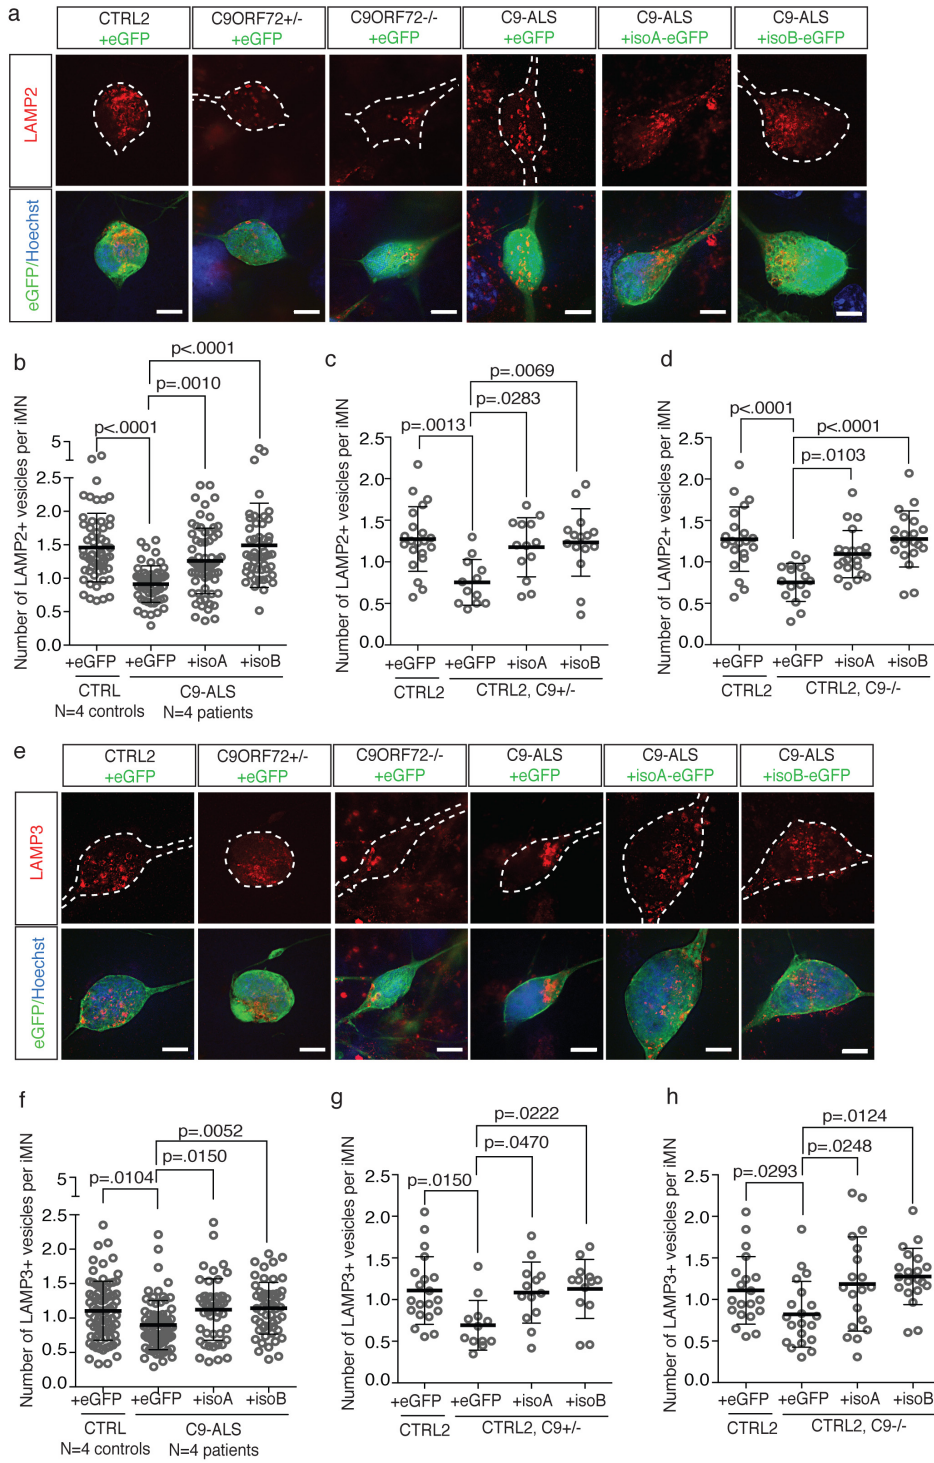

Supp. Figure 8(i-k). Reduced C9ORF72 activity disrupts vesicle trafficking and lysosomal biogenesis in iMNs

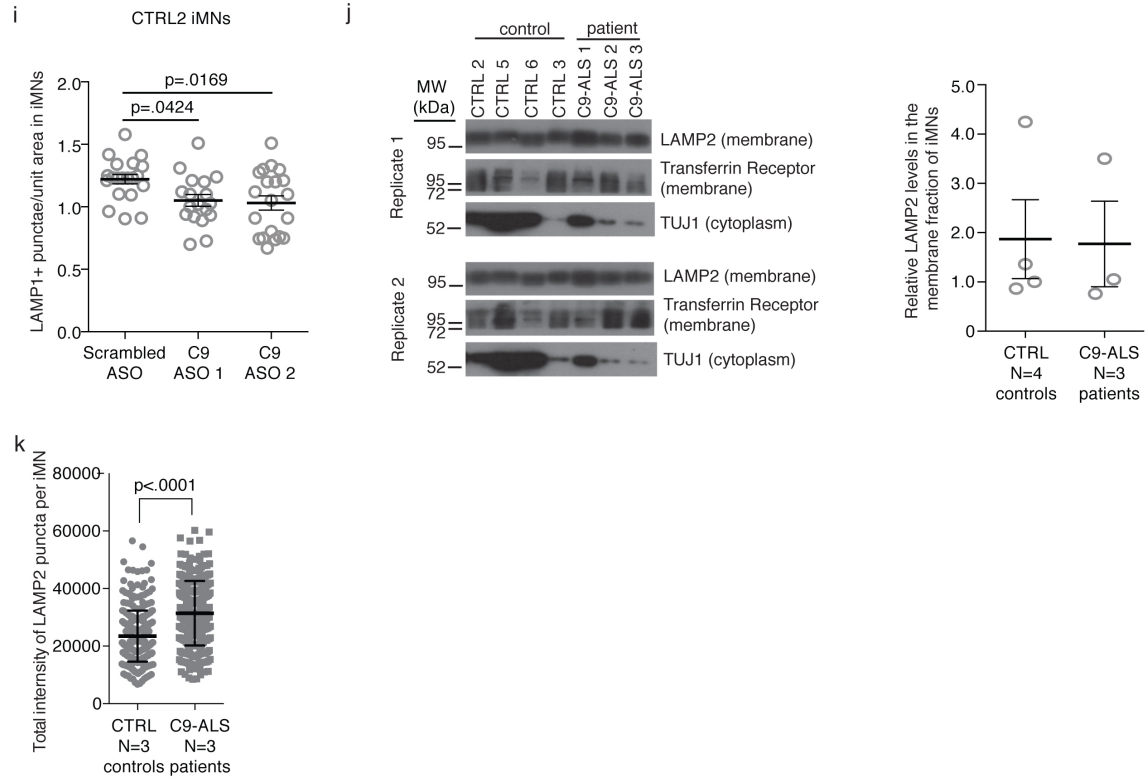

**Supplementary Figure 8**, related to Figure 3. Reduced C9ORF72 activity disrupts vesicle trafficking and lysosomal biogenesis in iMNs. **a**, LAMP2 immunostaining in iMNs of specified genotypes expressing eGFP or C9ORF72 (isoform A or B)-eGFP. Scale bar: 5  $\mu$ m. Dotted lines outline iMNs. **(b-d)** Number of LAMP2<sup>+</sup> vesicles in control (b-d), patient (b), *C9ORF72*<sup>+/-</sup> (c), and *C9ORF72*<sup>-/-</sup> (d) iMNs overexpressing eGFP or C9ORF72 (isoform A or B)-eGFP. Mean  $\pm$  s.d., each grey open circle represents a single iMN). n=80 iMNs per genotype from 4 different control or C9-ALS lines quantified from two biologically independent iMN conversions per condition (b), n=20 (CTRL + GFP), 12 (*C9ORF72*<sup>+/-</sup> + GFP), 13 (*C9ORF72*<sup>+/-</sup> + isoA), and 15 (*C9ORF72*<sup>+/-</sup> + isoB) iMNs from two biologically independent iMN conversions per condition (c), n=20 iMNs from two biologically independent iMN conversions per genotype per condition (d). For (b), one way-ANOVA with Tukey correction between control and patient conditions, F-value (DFn, DFd): (3, 122) = 15.58. For (c), one way-ANOVA with Tukey correction between CTRL2 and *C9ORF72*<sup>+/-</sup>, F-value (DFn, DFd): (3, 57) = 5.762. For (d), one way-ANOVA with Tukey correction between CTRL2 and *C9ORF72*<sup>-/-</sup>, F-value (DFn, DFd): (3, 74) = 10.27. **e**, LAMP3 immunostaining in iMNs of specified genotypes expressing eGFP or C9ORF72 (isoform A or B)-eGFP. Scale bar: 5  $\mu$ m. Dotted lines outline iMNs. **(f-h)** Number of LAMP3<sup>+</sup> vesicles in control (f-h), patient (f), *C9ORF72*<sup>+/-</sup> (g), and *C9ORF72*<sup>-/-</sup> (h) iMNs overexpressing eGFP or C9ORF72 (isoform A or B)-eGFP (mean  $\pm$  s.d. of iMNs from two biological replicates, each grey open circle represents a single iMN). n=80 iMNs per genotype from 4 different control or C9-ALS lines quantified from two biologically independent iMN conversions per condition (f), n=20 (CTRL + GFP), 12 (*C9ORF72*<sup>+/-</sup> + GFP), 13 (*C9ORF72*<sup>+/-</sup> + isoA), and 15 (*C9ORF72*<sup>+/-</sup> + isoB) iMNs from two biologically independent iMN conversions per condition (g), n=20 iMNs from two biologically independent iMN conversions per genotype per condition (h). For (f), one way-ANOVA with Tukey correction between control and patient conditions, F-value (DFn, DFd): (3, 247) = 5.329. For (g), one way-ANOVA with Tukey correction between CTRL2 and *C9ORF72*<sup>+/-</sup>, F-value (DFn, DFd): (3, 54) = 4.112. For (h), one way-ANOVA with Tukey correction between CTRL2 and *C9ORF72*<sup>-/-</sup>, F-value (DFn, DFd): (3, 75) = 4.11. **i**, Quantification of LAMP1 immunostaining in control iMNs treated with scrambled or *C9ORF72*-tageting ASOs. Data points represent individual cells. One way-ANOVA with Tukey correction across all comparisons F-value (DFn, DFd): (2, 55) = 4.832. n= 20 (+GFP), 18 (+isoA), and 20 (+isoB) iMNs quantified from two biologically independent iMN conversions in each ASO condition. Mean  $\pm$  s.e.m. **j**, Immunoblotting and quantification of LAMP2 levels in the membrane fraction of control and C9-ALS patient iMNs. LAMP2 levels were normalized to cytosolic TUJ1 and membrane-bound Transferrin receptor levels to account for the number of neurons harvested and the efficiency of membrane extraction. One sample each from n=4 and 3 biologically independent samples from different control and C9-ALS lines, respectively. Two-tailed t-test between all controls combined *versus* all patients combined, t-value = 0.08058, degrees of freedom = 5. Mean  $\pm$  s.d. **k**, LAMP2 immunostaining intensity in individual LAMP2<sup>+</sup> vesicles iMNs of specified genotypes. n = 100 LAMP2<sup>+</sup> vesicles quantified within a total of 10 iMNs per line, 3 lines per genotype, 2 biologically independent iMN conversions per line. Two-tailed t-test. t-value: 9.571, degrees of freedom: 563.5. Mean  $\pm$  s.d. Each data point represents a single LAMP2<sup>+</sup> vesicle.



Supplementary Figure 9. Reduced C9ORF72 activity disrupts M6PR+ vesicle trafficking in iMNs

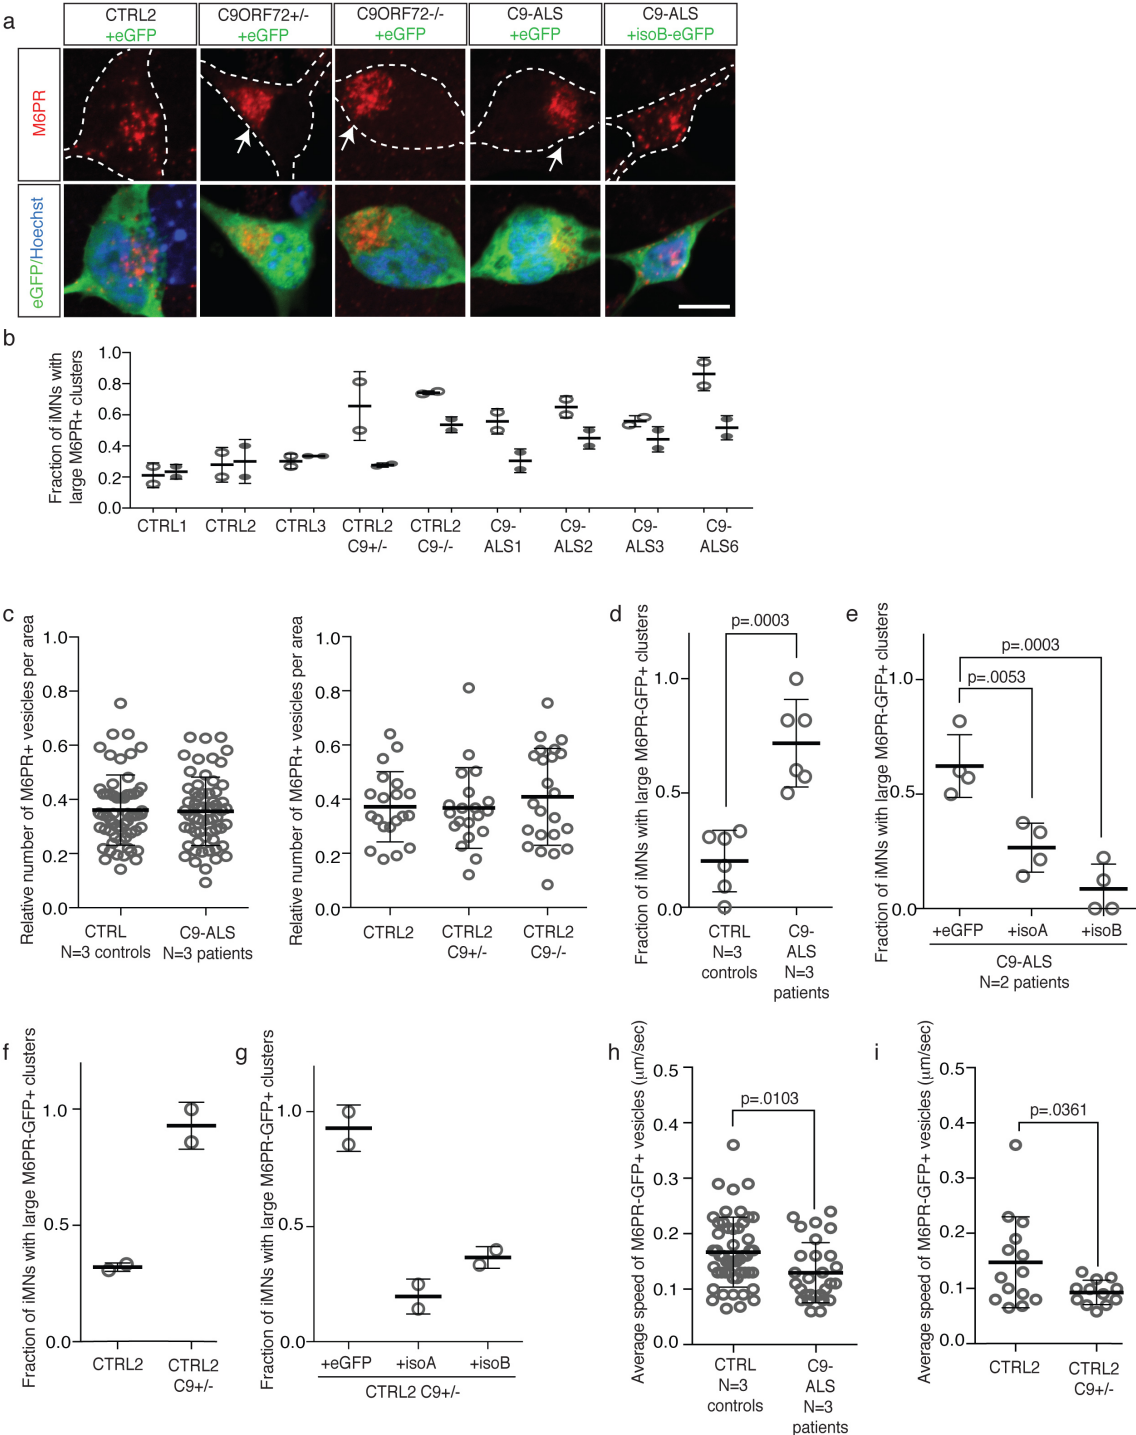

Supplementary Figure 9. Reduced C9ORF72 activity disrupts M6PR+ vesicle trafficking in iMNs

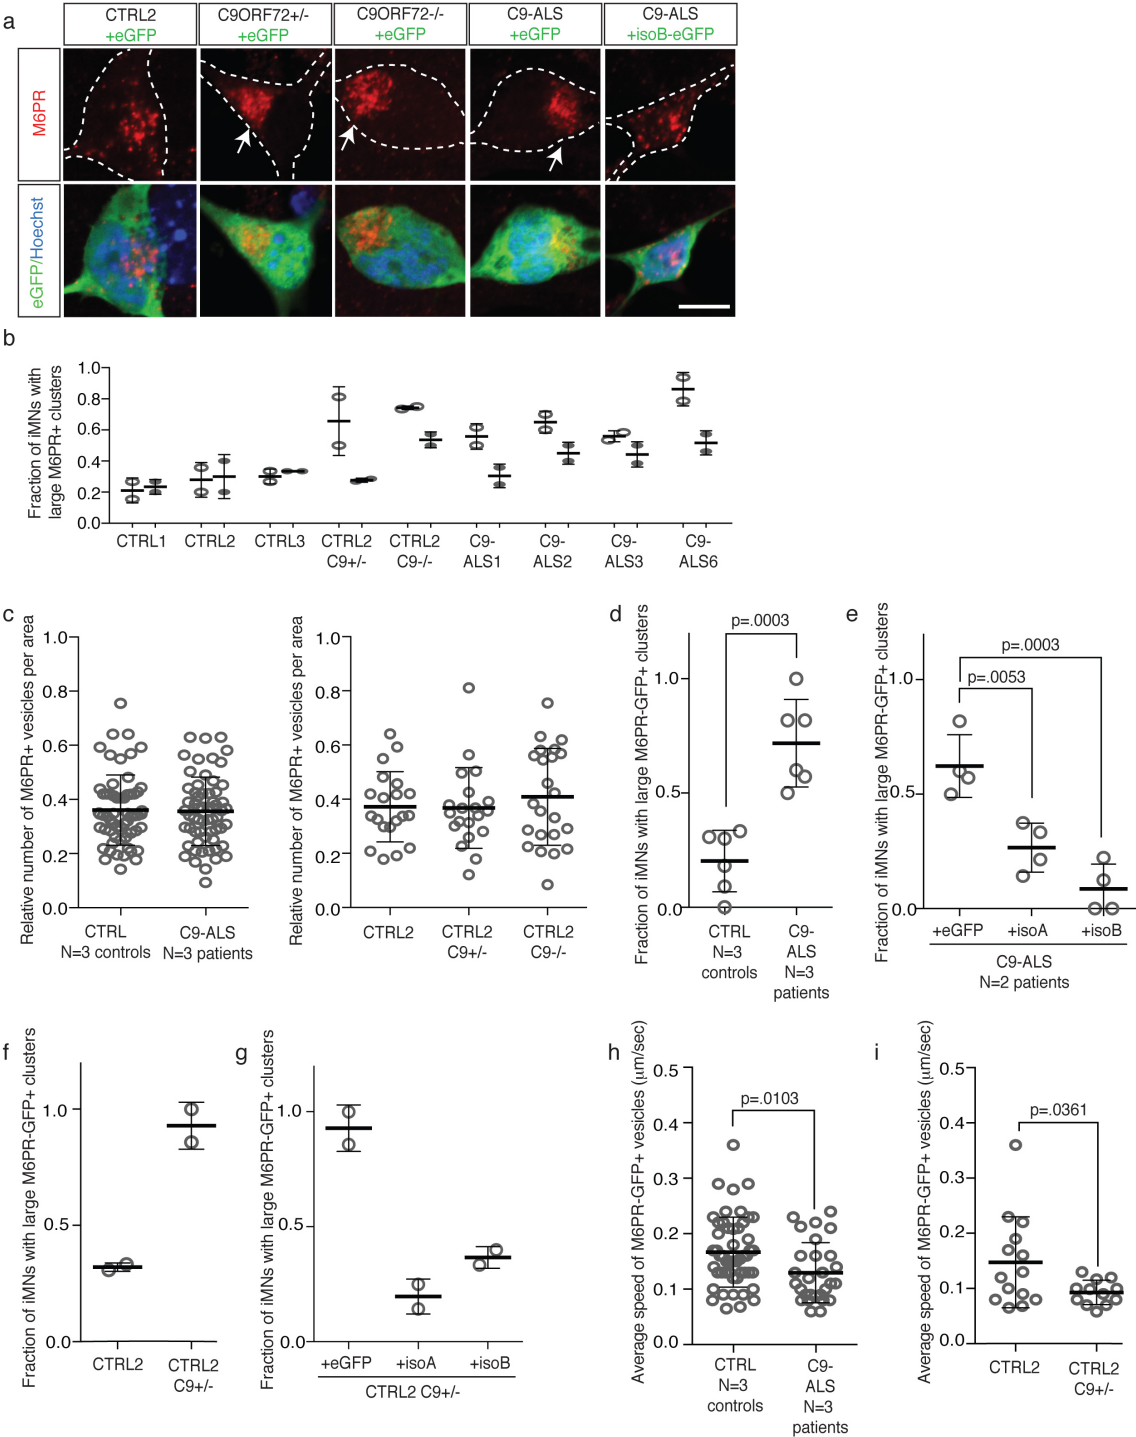

**Supplementary Figure 9**, related to Figure 3. Reduced C9ORF72 activity disrupts M6PR+ vesicle trafficking in iMNs. **a**, Confocal microscopy images of M6PR staining in iMNs of specified genotypes. Arrows denote large clusters of M6PR<sup>+</sup> vesicles. Scale bar: 5  $\mu$ m. This experiment was repeated twice with similar results. Dotted lines outline iMNs. **b**, Fraction of iMNs containing large (>6 vesicles) clusters of M6PR<sup>+</sup> vesicles in control, patient, *C9ORF72*<sup>+/-</sup>, and *C9ORF72*<sup>-/-</sup> iMNs overexpressing eGFP or *C9ORF72* isoform B-eGFP. Mean  $\pm$  s.d. (n=2 biologically independent iMN conversions per condition, n=15 cells per conversion). **c**, The number of M6PR+ vesicles per cytoplasmic area in control, C9-ALS, *C9ORF72*<sup>+/-</sup>, or *C9ORF72*<sup>-/-</sup> iMNs. n=55 iMNs from two biologically independent iMN conversions from 3 control lines from different donors and 60 iMNs from two biologically independent iMN conversions from 3 C9-ALS lines from different donors, two-tailed t-test, t-value = 0.1864, degrees of freedom = 119 for control vs C9-ALS comparison, and n=20 iMNs from two biologically independent iMN conversions from each line, one way-ANOVA with Tukey correction, F-value (DFn, DFd): (2, 60) = 0.4636 for the control vs *C9ORF72*<sup>+/-</sup> and *C9ORF72*<sup>-/-</sup> comparisons. Mean  $\pm$  s.d. **d-g**, The fraction of control (**d, f**), C9-ALS (**d, e**), and *C9ORF72*<sup>+/-</sup> (**f, g**) iMNs containing large M6PR-GFP+ clusters as determined by live imaging over a 1 minute time course. **e, g**, The fraction of C9-ALS or *C9ORF72*<sup>+/-</sup> iMNs containing large M6PR-GFP+ clusters when expressing GFP, *C9ORF72* isoform A, or *C9ORF72* isoform B as determined by live imaging over a 1 minute time course. (d) Two-tailed t-test with Welch's correction, t-value = 7.058, degrees of freedom = 86.89, N=6 biologically independent iMN conversions from 3 control lines and 3 C9-ALS lines from different donors (two biologically independent iMN conversions per line), 15 iMNs analyzed per conversion. (e) One-way ANOVA with Tukey correction, F-value (DFn, DFd): (2, 166) = 18.90, n=4 biologically independent iMN cultures derived from 2 different C9-ALS lines per condition (two biologically independent cultures per line), 15 iMNs analyzed per replicate, (f) n=2 biologically independent iMN cultures per genotype, 15 iMNs analyzed per culture, (g) n=2 biologically independent iMN cultures per condition, 15 iMNs analyzed per culture. Mean  $\pm$  s.d. for (d-g). **h**, The average speed of M6PR-GFP+ vesicles in control and C9-ALS iMNs as determined by live imaging over a 1 minute time course. Two-tailed t-test, t-value = 3.185, degrees of freedom = 147, n=80 iMNs per genotype from 4 different donors and two biologically independent iMN conversions per genotype. Mean  $\pm$  s.d. **i**, The average speed of M6PR-GFP+ vesicles in control and *C9ORF72*<sup>+/-</sup> iMNs as determined by live imaging over a 1 minute time course. Two-tailed t-test, t-value = 3.08, degrees of freedom = 30, n=20 iMNs for control and 12 iMNs for *C9ORF72*<sup>+/-</sup> from two biologically independent iMN conversions per genotype. Mean  $\pm$  s.d.

Supplementary Figure 10 (a-e). Reduced *C9ORF72* Expression Sensitizes iMNs to Glutamate

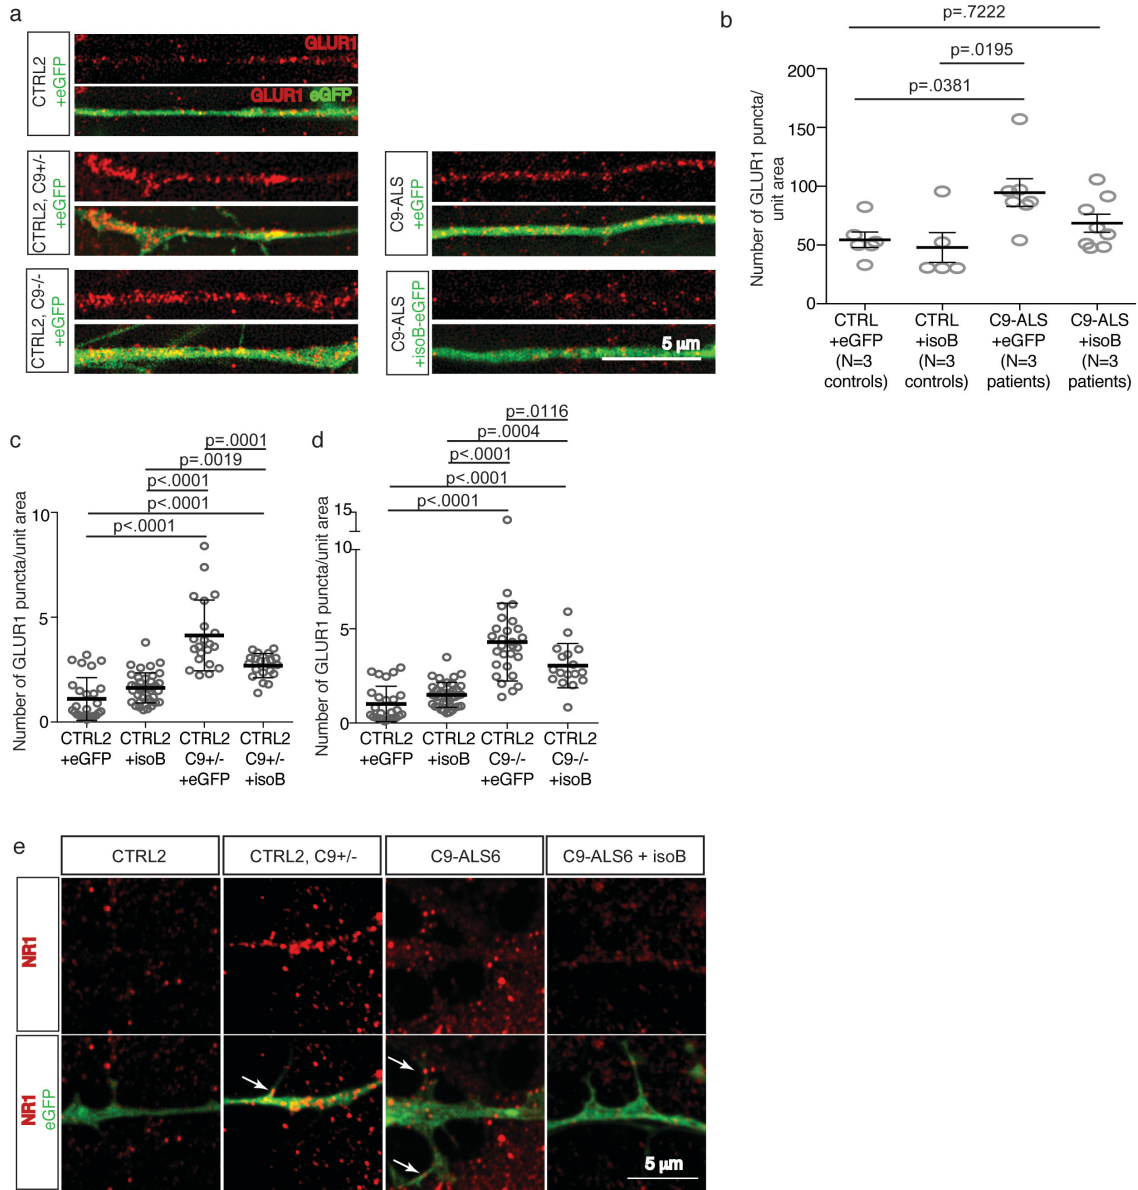

Supplementary Figure 10 (f-n). Reduced *C9ORF72* Expression Sensitizes iMNs to Glutamate

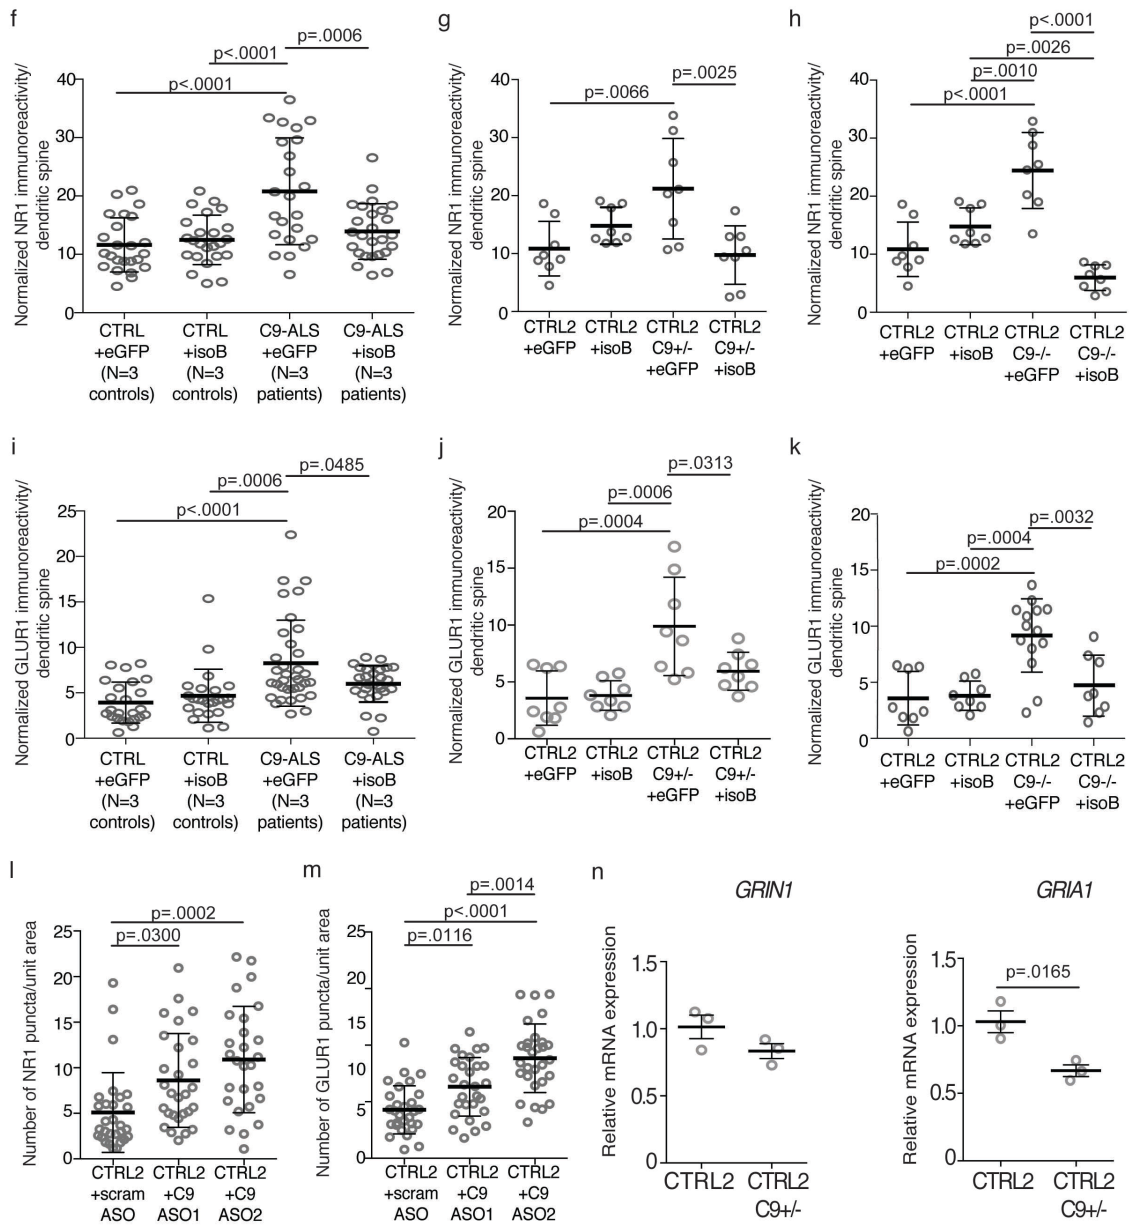

**Supplementary Figure 10**, related to Figure 4. Reduced C9ORF72 Expression Sensitizes iMNs to Glutamate. **a**, Super-resolution microscopy images of immunofluorescence shows GLUR1+ puncta on neurites of iMNs overexpressing eGFP or C9ORF72 isoform B-eGFP. Scale bar: 5  $\mu$ m. **(b-d)** Number of GLUR1+ puncta per unit area in control (b-d), patient (b), *C9ORF72*<sup>+/-</sup> (c), and *C9ORF72*<sup>+/-</sup> (d) iMNs. For (b), n=6 biologically independent iMN conversions for control + GFP, 5 biologically independent iMN conversions for control + isoB, 7 biologically independent iMN conversions for C9-ALS + GFP, and 8 biologically independent iMN conversions for C9-ALS + isoB, each from 3 different donor lines per genotype, one-way ANOVA with Tukey correction, F-value (DFn, DFd): (3, 22) = 4.361. Mean +/- s.e.m. For (c), n=26 iMNs for ctrl2 + GFP, 38 iMNs for ctrl2 + isoB, 21 iMNs for *C9ORF72*<sup>+/-</sup> + GFP, and 21 iMNs for *C9ORF72*<sup>+/-</sup> + isoB from two biologically independent iMN conversions per line, one-way ANOVA with Tukey correction, F-value (DFn, DFd): (3, 101) = 39.5. Mean +/- s.d. For (d), n=26 iMNs for ctrl2 + GFP, 38 iMNs for ctrl2 + isoB, 28 iMNs for *C9ORF72*<sup>-/-</sup> + GFP, and 17 iMNs for *C9ORF72*<sup>-/-</sup> + isoB from two biologically independent iMN conversions per line, one-way ANOVA with Tukey correction, F-value (DFn, DFd): (3, 105) = 37.65. Mean  $\pm$  s.d., each grey open circle represents the number of GLUR1+ puncta per unit area on a single neurite (one neurite quantified per iMN). **e**, Super-resolution microscopy images of immunofluorescence shows NR1+ puncta (arrows) on dendritic spines of iMNs overexpressing eGFP or C9ORF72 isoform B-eGFP. Scale bar: 5  $\mu$ m. **(f-h)** Fluorescence intensity of NR1 per unit area on dendritic spines in control (f-h), patient (f), *C9ORF72*<sup>+/-</sup> (g), and *C9ORF72*<sup>+/-</sup> (h) iMNs. For (f), n=24 iMNs for control + GFP, 24 iMNs for control + isoB, 23 iMNs for C9-ALS + GFP, and 26 iMNs for C9-ALS + isoB from 3 different donor lines per genotype, two biologically independent iMN conversions per line, one-way ANOVA with Tukey correction, F-value (DFn, DFd): (3, 93) = 11.37. For (g), n=8 iMNs per condition from two biologically independent iMN conversions, one-way ANOVA with Tukey correction, F-value (DFn, DFd): (3, 28) = 6.418. For (h), n=8 iMNs per condition from two biologically independent iMN conversions, one-way ANOVA with Tukey correction, F-value (DFn, DFd): (3, 28) = 24.45. Mean  $\pm$  s.d., each grey open circle represents the mean intensity of NR1+ puncta per unit area on spines from 3-9 dendrites on a single iMN. **i-k**, Fluorescence intensity of GLUR1 per unit area on dendritic spines in control (i-k), patient (i), *C9ORF72*<sup>+/-</sup> (j), and *C9ORF72*<sup>+/-</sup> (k) iMNs. For (i), n=24 iMNs for control + GFP, 24 iMNs for control + isoB, 23 iMNs for C9-ALS + GFP, and 26 iMNs for C9-ALS + isoB from 3 different donor lines per genotype, two biologically independent iMN conversions per line, one-way ANOVA with Tukey correction, F-value (DFn, DFd): (3, 105) = 9.679. For (j), n=8 iMNs for control + GFP, 8 iMNs for control + isoB, 9 iMNs for *C9ORF72*<sup>+/-</sup> + GFP, and 8 iMNs for *C9ORF72*<sup>+/-</sup> + isoB from two biologically independent iMN conversions, one-way ANOVA with Tukey correction, F-value (DFn, DFd): (3, 28) = 9.453. For (k), n=8 iMNs for control + GFP, 8 iMNs for control + isoB, 14 iMNs for *C9ORF72*<sup>-/-</sup> + GFP, and 8 iMNs for *C9ORF72*<sup>-/-</sup> + isoB from two biologically independent iMN conversions, one-way ANOVA with Tukey correction, F-value (DFn, DFd): (3, 34) = 11.2. Mean  $\pm$  s.d., each grey open circle represents the mean intensity of GLUR1+ puncta per unit area on spines from 3-9 dendrites on a single iMN. **l-m**, Number of NR1+ (l) and GLUR1+ (m) puncta per unit area on neurites on iMNs treated with a scrambled ASO or *C9ORF72*-targeting ASOs.

One way-ANOVA with Tukey correction across all comparisons. For (l), F-value (DFn, DFd): (2, 81) = 9.167. n= 29 (Scrambled ASO), 28 (C9 ASO1), and 27 (C9 ASO2) iMNs quantified from two biologically independent iMN conversions in each ASO condition. Mean +/- s.d. For (m), F-value (DFn, DFd): (2, 32) = 22.12. n= 29 (Scrambled ASO), 28 (C9 ASO1), and 30 (C9 ASO2) iMNs quantified from two biologically independent iMN conversions in each ASO condition. Mean +/- s.d. (Each grey open circle represents the number of NR1+ or GLUR1+ puncta per unit area on a single neurite (one neurite quantified per iMN). **n**, qRT-PCR analysis of *GRIN1* (NR1) and *GRIA1* (GLUR1) mRNA levels in *C9ORF72* wild-type and heterozygous iMNs. Mean  $\pm$  s.e.m. n=3 biologically independent iMN conversions. Two-tailed t-test. t-value = 3.975, degrees of freedom = 4.





**Supplementary Figure 11**, related to Figure 4. Gene Expression Profile of Dox-NIL Motor Neurons. **a**, Immunofluorescence analysis of HB9 levels in Dox-NIL iMN cultures. Scale Bar: 100  $\mu\text{m}$ . **b**, Immunofluorescence analysis of TUJ1, MAP2, and SMI-32 levels in Dox-NIL iMN cultures. Scale Bar: 40  $\mu\text{m}$ . Experiments in (a-b) were repeated twice with similar results. **c**, Heatmap and dendrogram of iMNs, Dox-NIL iMNs, and iPSCs. The heatmap depicts the computed euclidean distance value (of the rlog transformed DESeq2 normalized gene counts) of each sample compared to each other. RNA sequencing experiments were performed and quantified using 2 biological replicates/individual differentiations per sample.

Supplementary Figure 12. Reduced C9ORF72 levels lead to increased motor neuron glutamate receptor levels *in vivo*

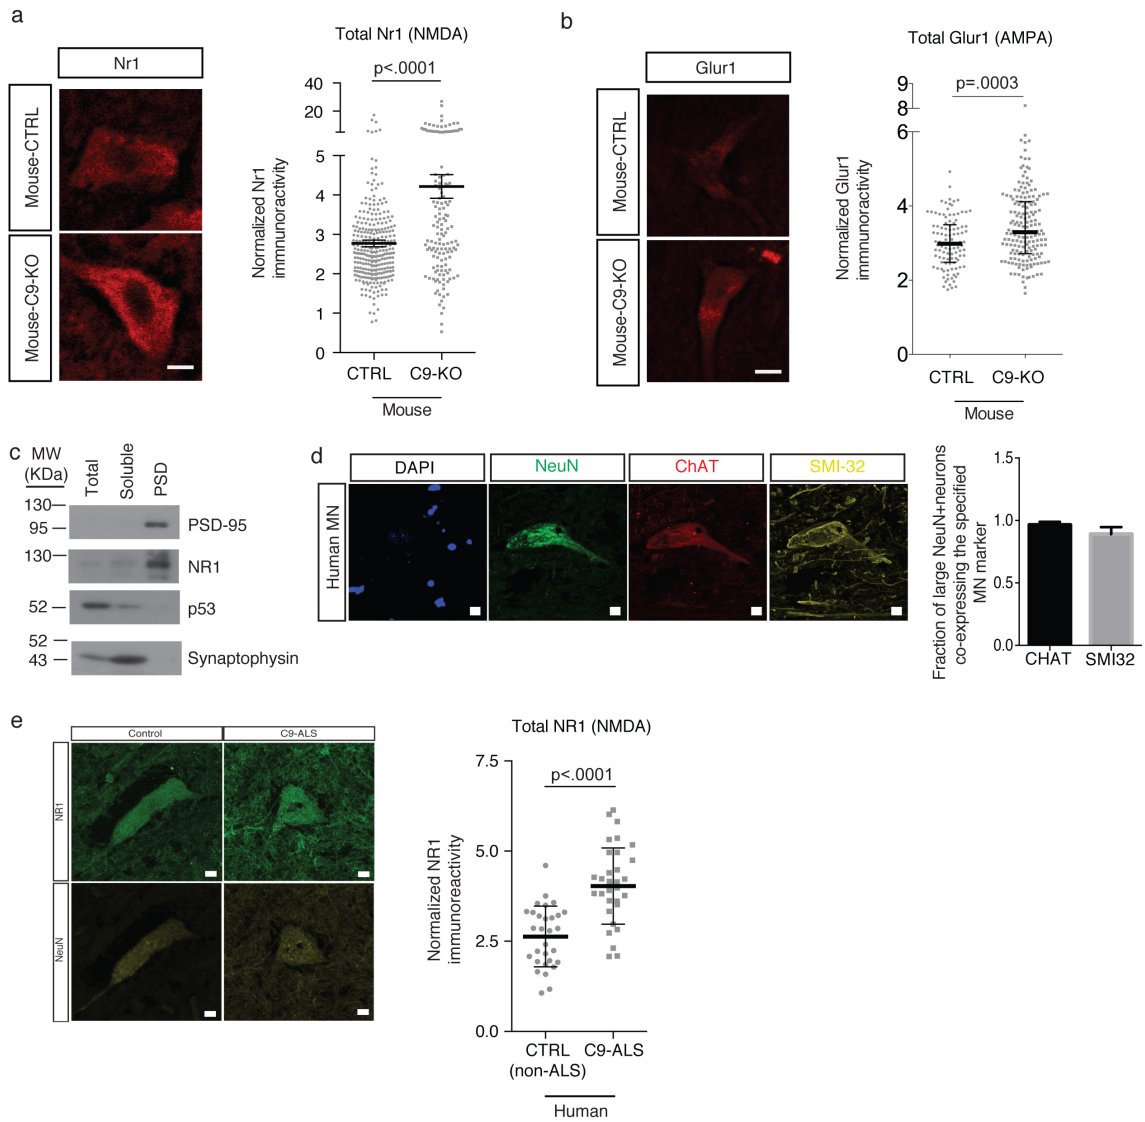

**Supplementary Figure 12**, related to Figure 4. Reduced C9ORF72 levels lead to increased glutamate receptor levels on motor neurons in vivo. **a-b**, Immunohistochemistry and quantification of NR1 (**a**) and GluR1 (**b**) in post-mortem lumbar sections of *Nestin-Cre*<sup>+/-</sup> *C9orf72*<sup>loxP/loxP</sup> mice. For (a), n=297 control and 146 *C9orf72*<sup>-/-</sup> motor neurons, and for (b), n=106 control and 174 *C9orf72*<sup>-/-</sup> motor neurons quantified from 10 ventral horn sections from 2 animals per genotype. Two-sided Mann-Whitney test, median +/- interquartile range. Data points represent a single cell. **c**, Western blot showing the purity of post-synaptic density-enriched (PSD) preparations. PSD-95 resides only in the post-synaptic density-enriched fraction and not in the total or triton-soluble fractions. NR1 shows a similar pattern, but as expected, p53 and Synapsin show the opposite pattern. This experiment was repeated twice with similar results. **d**, Representative immunohistochemistry and quantification of motor neuron marker levels in human post-mortem lumbar spinal cord neurons, using CHAT and SMI-32 antibodies to identify spinal motor neurons. Scale bars: 4  $\mu$ m. Quantification derived from n=11 fields of view taken from 4 different spinal cord sections, covering 48 large neurons. Mean +/- s.e.m. **e**, Representative NR1 immunohistochemistry and quantification of control and C9-ALS post-mortem lumbar spinal cord. N=30 control and 32 C9-ALS motor neurons taken from 3 donors per genotype. Data points represent a single cell. Two-tailed t-test, t-value = 5.562, degrees of freedom = 60. Scale bars: 4  $\mu$ m. Mean +/- s.e.m.

Supplementary Figure 13 (a-g). Reduced *C9ORF72* Expression Sensitizes iMNs to Glutamate

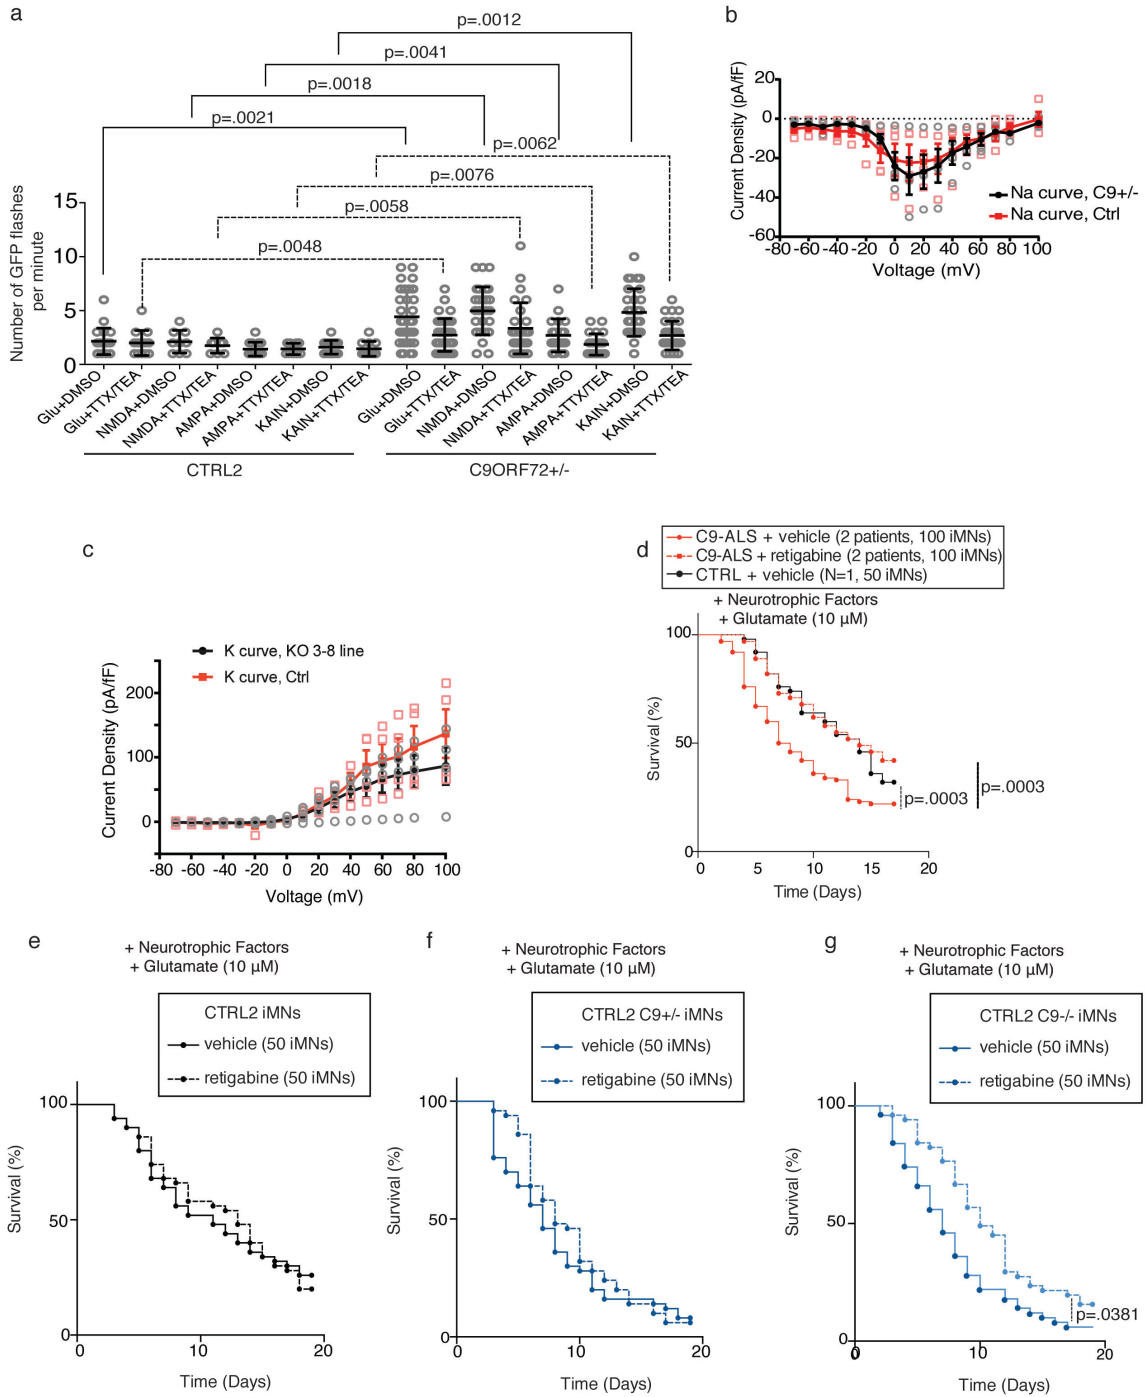

Supplementary Figure 13h. Reduced *C9ORF72* Expression Sensitizes iMNs to Glutamate

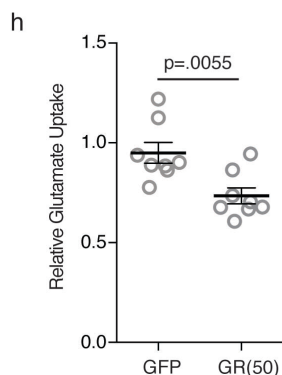

**Supplementary Figure 13**, related to Fig. 4. Reduced *C9ORF72* Expression Sensitizes iMNs to Glutamate. **a**, GCaMP6 assay to look at the relative contributions of different glutamate receptors to the hyperexcitability phenotype of *C9ORF72* mutant iMNs. *C9ORF72*<sup>+/-</sup> iMNs have heightened responses to NMDA, AMPA, and kainite, as well as to glutamate (Glu) that activates all three receptor types. This is still true when calcium influx from action potentials is blocked by TTX/TEA treatment (blue bars)(mean ± s.e.m. n=20 (CTRL2 + Glutamate + DMSO), 13 (CTRL2 + Glutamate + TTX/TEA), 9 (CTRL2 + NMDA + DMSO), 8 (CTRL2 + NMDA + TTX/TEA), 14 (CTRL2 + AMPA + DMSO), 9 (CTRL2 + AMPA + TTX/TEA), 15 (CTRL2 + kainate + DMSO), 11 (CTRL2 + kainate + TTX/TEA), 35 (*C9*<sup>+/-</sup> + Glutamate + DMSO), 38 (*C9*<sup>+/-</sup> + Glutamate + TTX/TEA), 29 (*C9*<sup>+/-</sup> + NMDA + DMSO), 28 (*C9*<sup>+/-</sup> + NMDA + TTX/TEA), 20 (*C9*<sup>+/-</sup> + AMPA + DMSO), 22 (*C9*<sup>+/-</sup> + AMPA + TTX/TEA), 29 (*C9*<sup>+/-</sup> + kainate + DMSO), and 32 (*C9*<sup>+/-</sup> + kainate + TTX/TEA) iMNs quantified from 3 biologically independent iMN conversions. One-way ANOVA with Tukey correction for all comparisons. F-value (DFn, DFd): (15, 316) = 11.06. **b**, Sodium and **c**, potassium curves for control and *C9ORF72*<sup>+/-</sup> iMNs obtained by patch clamp electrophysiology. Curves are representative of for each genotype (n=4 curves per genotype). Two-tailed t-test at each voltage. Mean ± s.e.m. **d-g**, The potassium channel agonist retigabine does not affect control (CTRL2) (**e**) or iMNs with heterozygous (**f**) mutations in *C9ORF72*, but enhances the survival of iMNs with homozygous (**g**) mutations in *C9ORF72* and *C9*-ALS iMNs (**d**). n=50 iMNs per condition quantified from 3 biologically independent iMN conversions. **h**, Glutamate uptake by human primary astrocytes expressing GFP or GR(50)-GFP. Astrocytes were incubated with 200 μM glutamate for 2 hours before uptake was measured. Mean ± s.e.m. n=8 biologically independent astrocyte cultures per condition. Two-tailed t-test. t-value = 3.278, degrees of freedom = 14. All iMN survival statistical analysis was performed using a two-sided log-rank test and experiments were performed in a Molecular Devices ImageExpress. Electrophysiology experiments were performed and quantified using 2 biologically independent iMN conversions.

Supplementary Figure 14. C9ORF72 levels modulate DPR toxicity

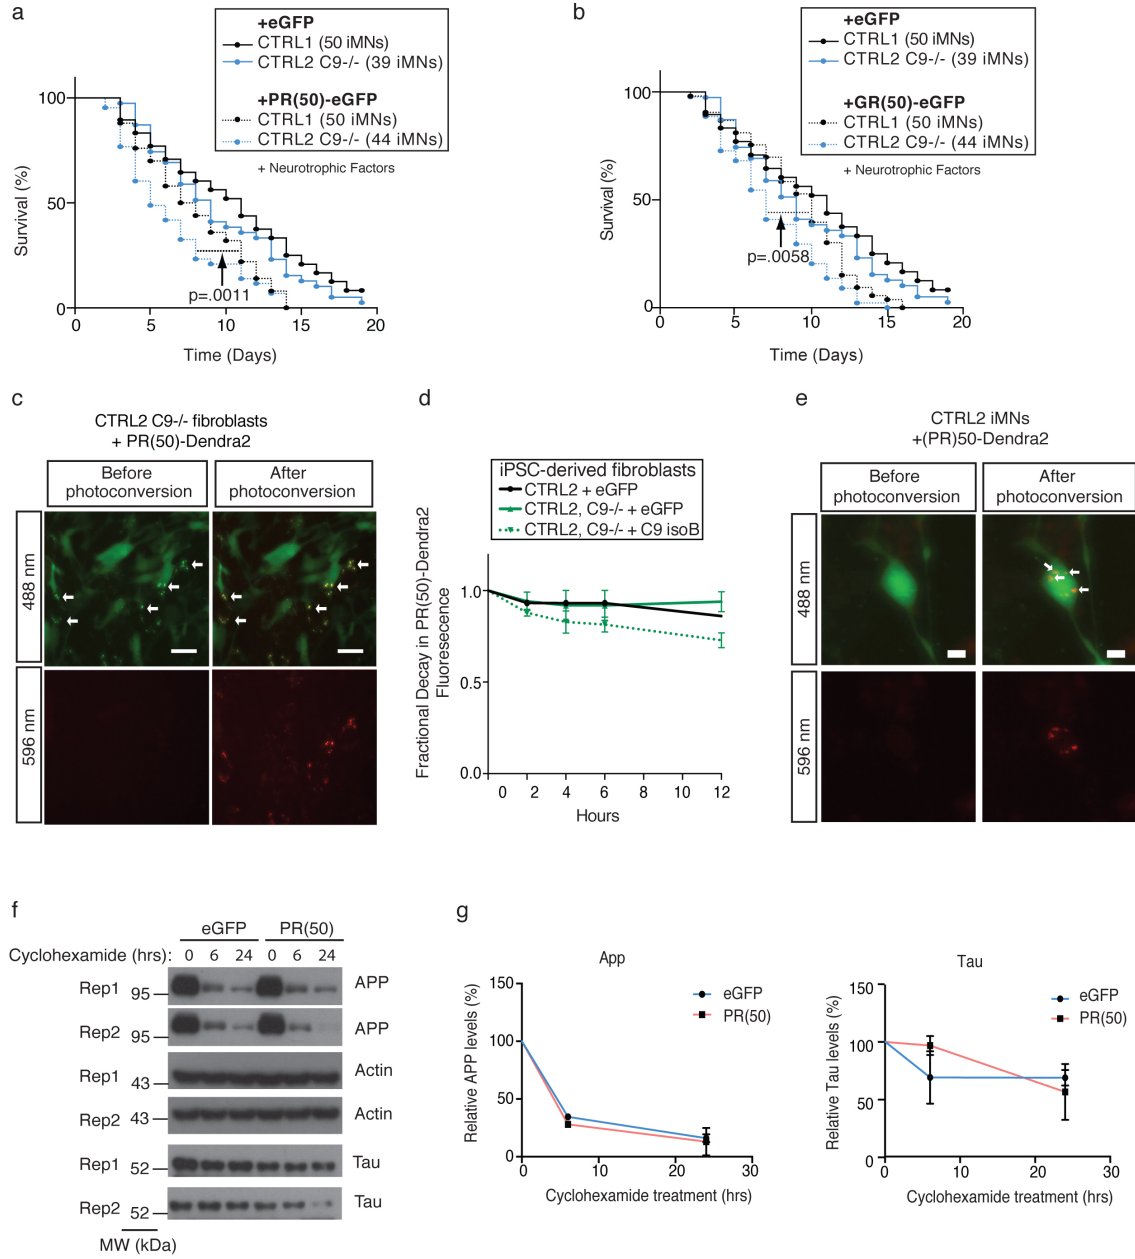

**Supplementary Data Figure 14**, related to Figure 5. C9ORF72 levels modulate DPR toxicity. **a-b**, Survival of control and CRISPR-mutant *C9ORF72*<sup>-/-</sup> iMNs in excess glutamate with overexpression of eGFP or PR(50)-eGFP (**a**) or GR(50)-eGFP (**b**). n=50 (CTRL + GFP or + DPR), 39 (*C9ORF72*<sup>-/-</sup> + GFP), or 44 (*C9ORF72*<sup>-/-</sup> + DPR) iMNs quantified from 3 biologically independent iMN conversions. **c**, PR(50)-Dendra2-expressing CTRL2 or *C9ORF72*<sup>-/-</sup> fibroblasts before and after Dendra2 Photoconversion (scale bar: 15 μm). **d**, Relative decay in Dendra2 fluorescence over 12 hours with overexpression of eGFP or C9ORF72 isoform B-T2A-eGFP in iPSC-derived fibroblasts. Mean +/- s.d. n= 2 biologically independent cell cultures per condition, of 10 cells quantified per culture. **e**, PR(50)-Dendra2-expressing CTRL2 iMNs before and after photoconversion (scale bar: 10 μm). **f**, Western blots and **g**, quantification of the decay of APP, ACTIN, and Tau over 6 and 24 hours in iMNs after application of continuous cyclohexamide treatment to inhibit protein synthesis. Protein decay in iMNs expressing GFP or PR(50)-GFP is shown. Mean protein level +/- s.d. of two biologically independent motor neuron differentiations. Experiments in (c, e, f) were repeated twice with similar results. All neuronal survival assays were performed and quantified using 3 biological replicates/individual differentiations.

Supplementary Figure 15 (a-e). Chemical and genetic modulators of vesicle trafficking rescue *C9ORF72* patient iMN survival

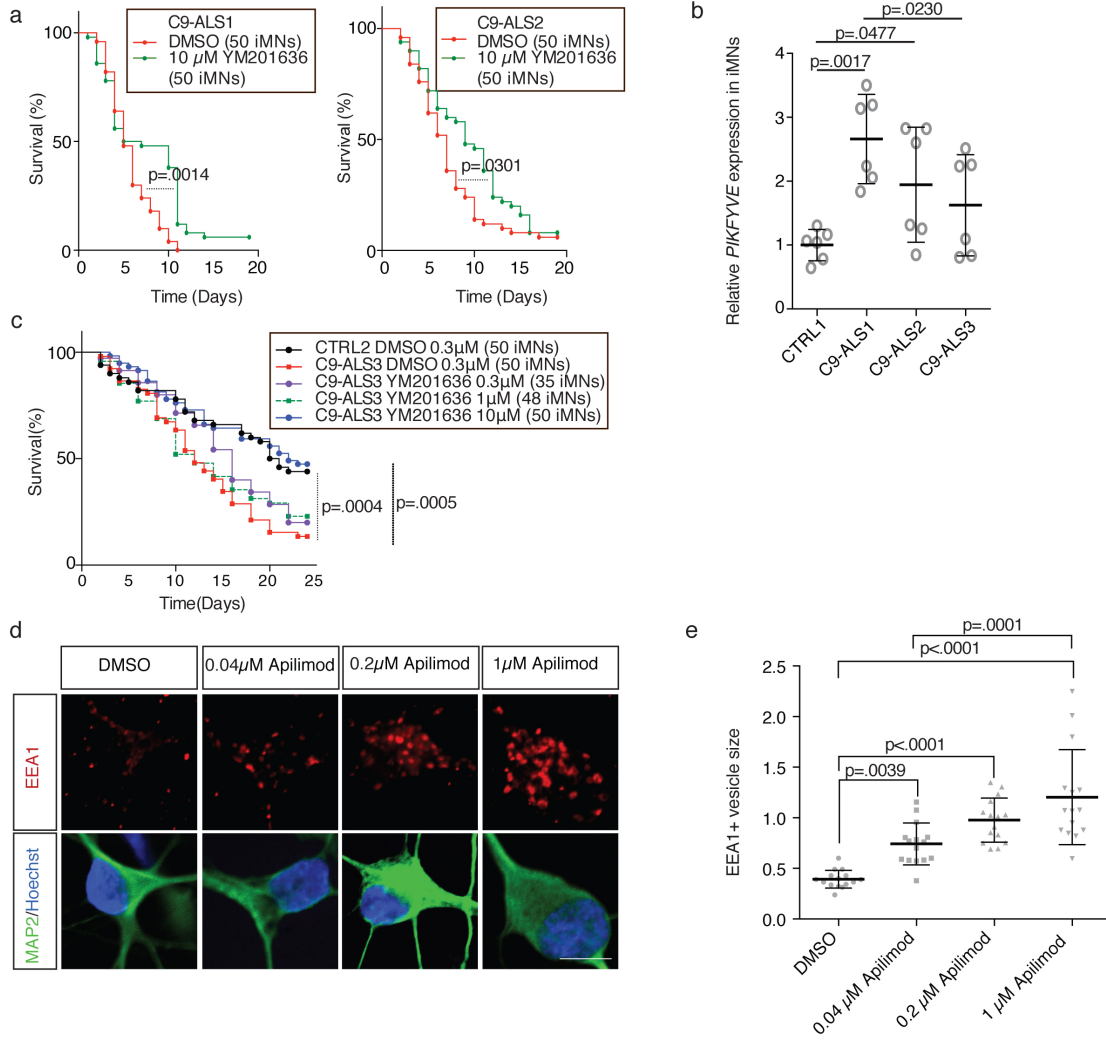



Supplementary Figure 15(f-h). Chemical and genetic modulators of vesicle trafficking rescue *C9ORF72* patient iMN survival

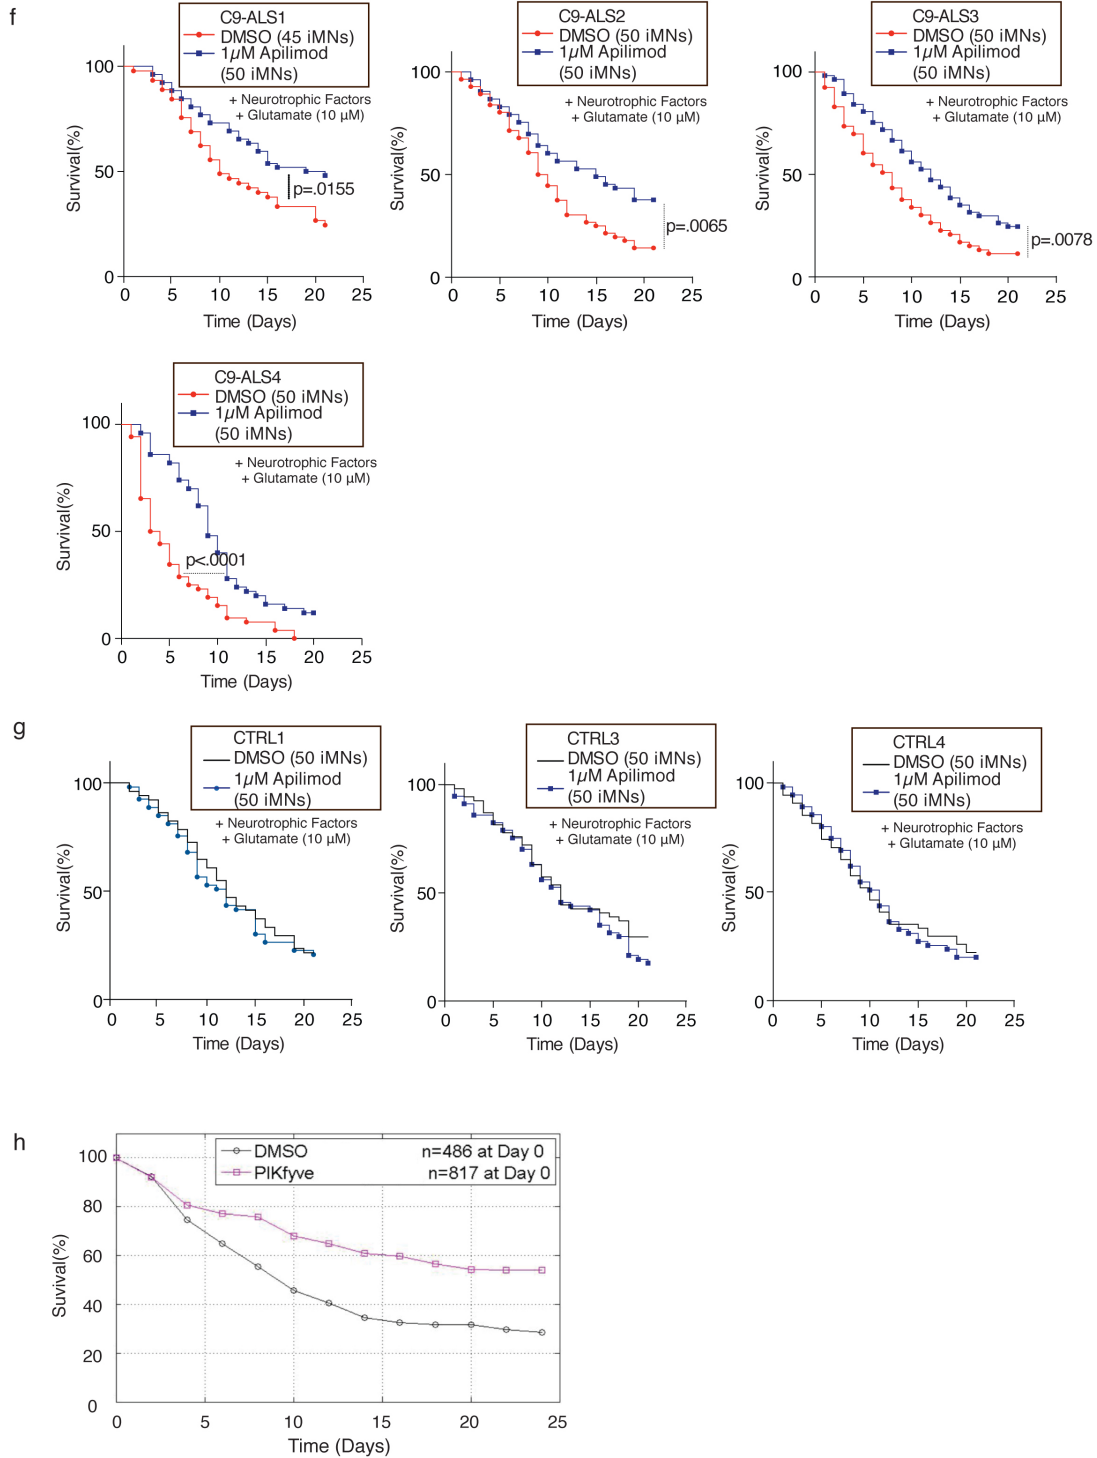

Supplementary Figure 15(i-n). Chemical and genetic modulators of vesicle trafficking rescue *C9ORF72* patient iMN survival

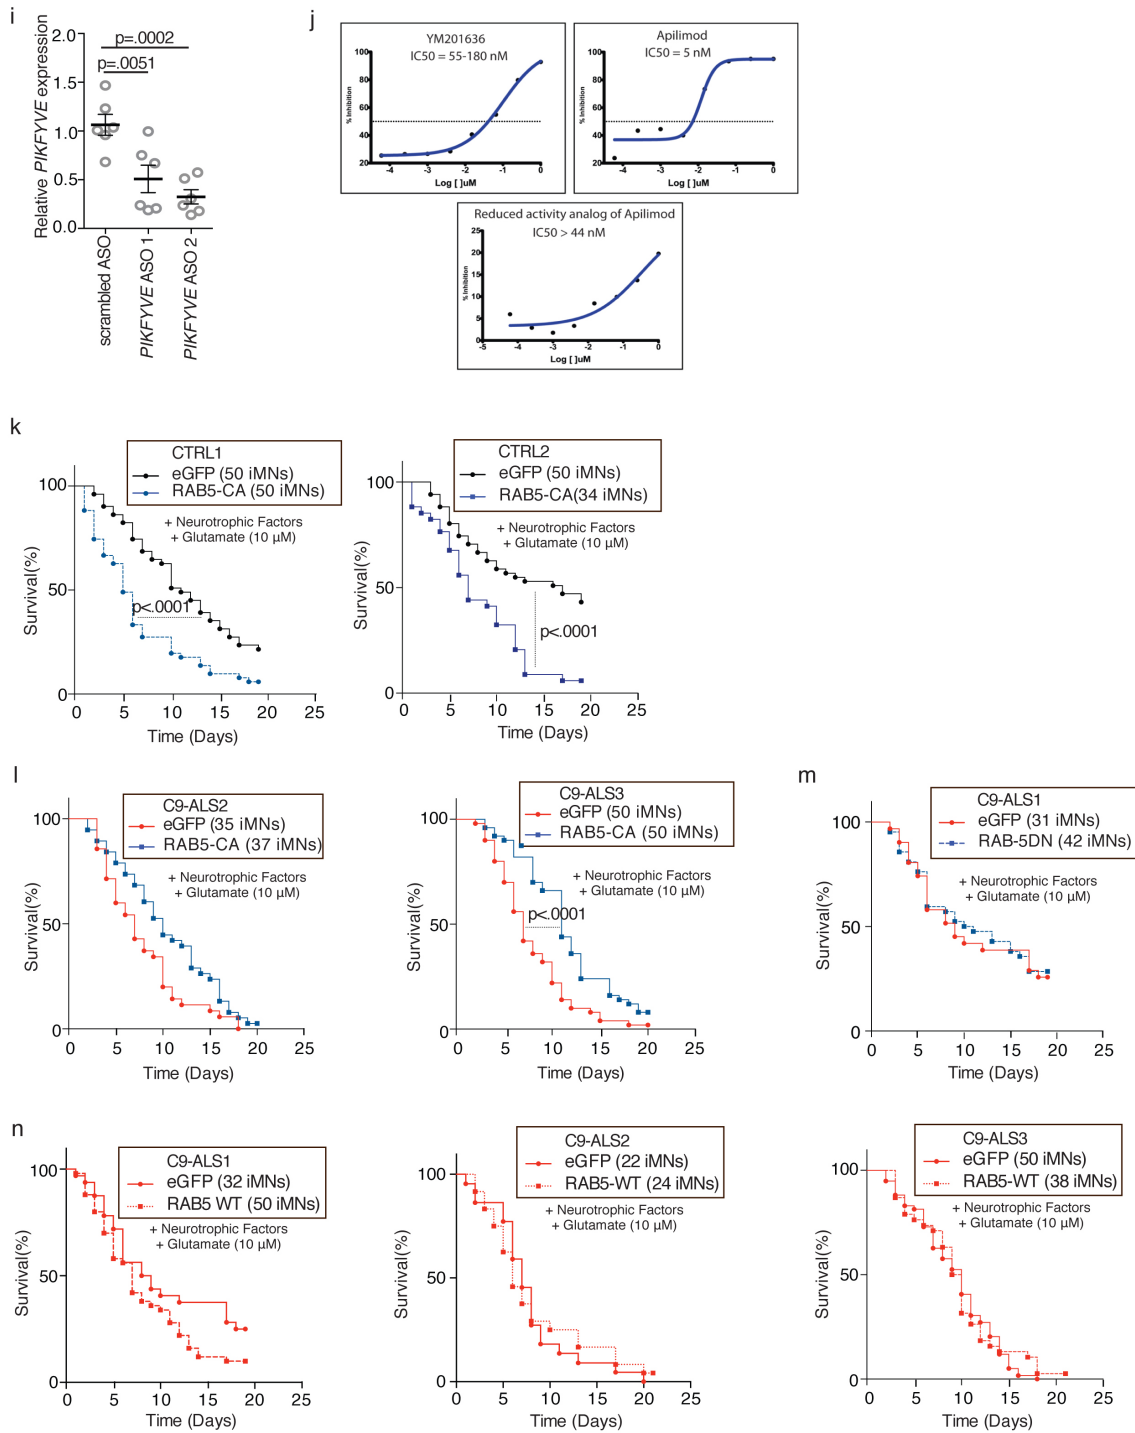

Supplementary Figure15(o-t). Chemical and genetic modulators of vesicle trafficking rescue *C9ORF72* patient iMN survival

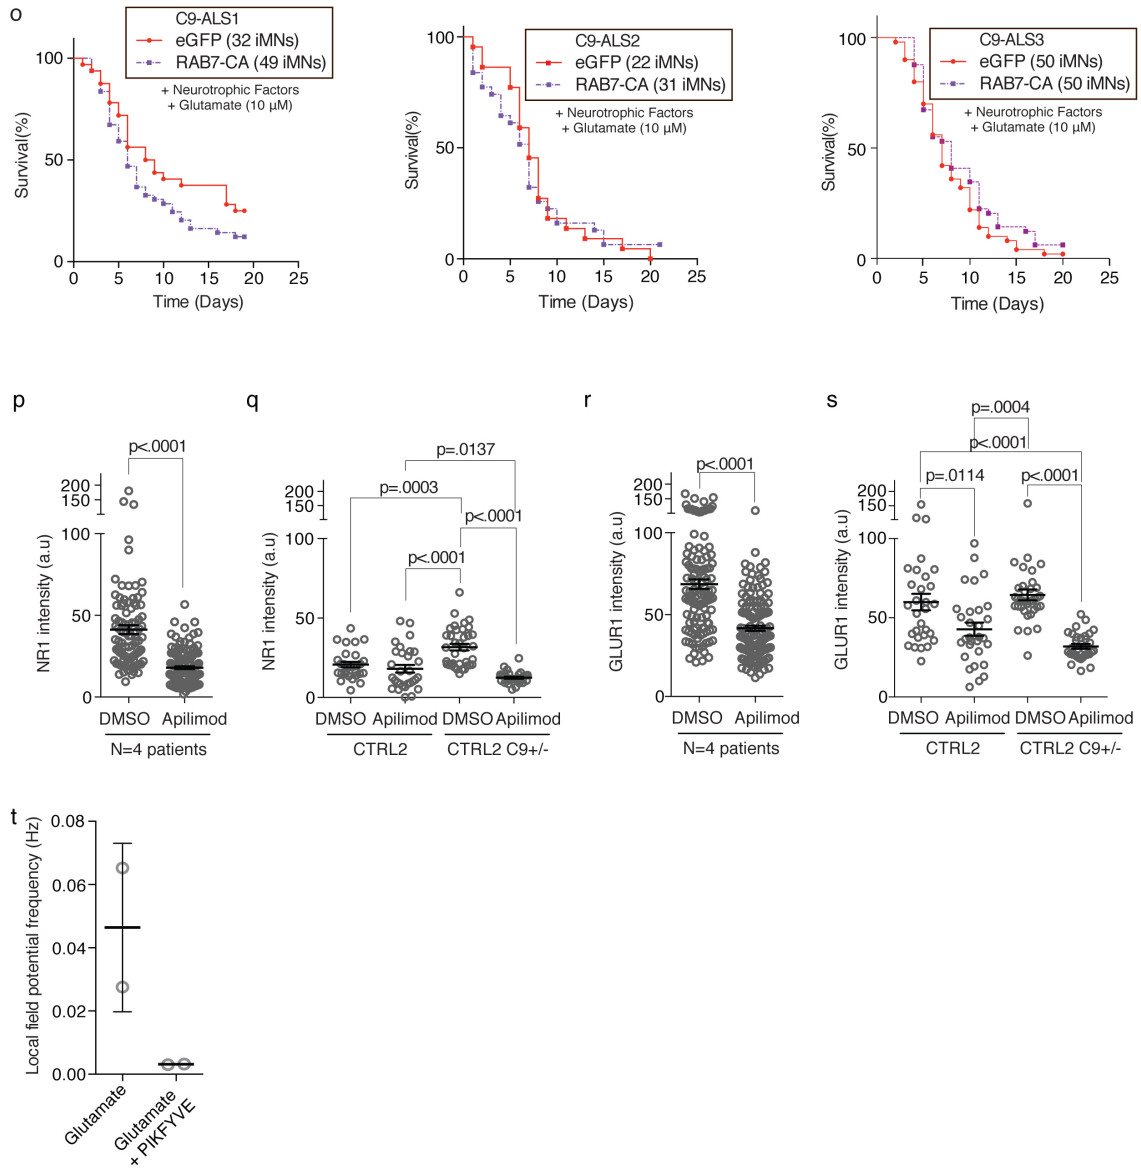

**Supplementary Data Figure 15**, related to Figure 6. Chemical and genetic modulators of vesicle trafficking rescue C9ORF72 patient iMN survival. **a**, Survival of iMNs in excess glutamate from two independent C9ORF72 patient lines with DMSO or YM201636 treatment. **b**, PIKFYVE mRNA expression in control and C9-ALS iMNs. n=6 biologically independent iMN conversions per line. One-way ANOVA with Tukey correction. F-value (DFn, DFd): (3, 20) = 5.775. Mean +/- s.d. **c**, Survival of C9ORF72 patient iMNs with a dose titration of YM201636. **d**, Immunostaining of EEA1<sup>+</sup> vesicles in C9ORF72 patient motor neurons to measure their size after a 3 hour treatment of Apilimod at the indicated doses. Scale bar = 10  $\mu$ m. **e**, Quantification of EEA1<sup>+</sup> vesicle size in C9ORF72 patient motor neurons after a 3 hour treatment of Apilimod. n=15 EEA1<sup>+</sup> vesicles per condition quantified from two biologically independent motor neuron conversions for each condition. One-way ANOVA with Tukey correction. F-value (DFn, DFd): (3, 56) = 22.64. Mean +/- s.d. **f**, Survival of iMNs in excess glutamate from four independent C9ORF72 patient lines with DMSO or Apilimod treatment. **g**, Survival of iMNs in excess glutamate from two independent control lines with DMSO or Apilimod treatment. **h**, Automated quantification of C9ORF72 patient 1 iMN survival with DMSO or Apilimod treatment using SVCell 4.0 (DRVision Technologies, LLC). Automated survival analysis replicates manual counting results. n=486 (DMSO) or 817 (Apilimod) C9-ALS iMNs quantified from 3 biologically independent iMN conversions per condition. **i**, qRT-PCR of PIKFYVE expression in iMN cultures treated with 3  $\mu$ M scrambled or PIKFYVE-targeting ASOs for 72 hrs. One way-ANOVA with Tukey correction across all comparisons, F-value (DFn, DFd): (2, 15) = 12.07. n= 6 biologically independent iMN conversions in each condition. Mean +/- s.d. **j**, Rates of PIKFYVE inhibition and IC<sub>50</sub> measurements for YM201636, Apilimod, and the reduced-activity analog of Apilimod using an *in vitro* biochemical assay for PIKFYVE activity (Signalchem). **k**, Survival of iMNs in excess glutamate from two independent control lines lines with GFP or constitutively-active RAB5 (RAB5CA-T2A-GFP) overexpression. **l**, Survival of iMNs in excess glutamate from two independent C9ORF72 patient with GFP or RAB5CA-T2A-GFP overexpression. **m**, Survival of C9ORF72 patient iMNs in excess glutamate with GFP or dominant-negative RAB5 (RAB5DN-T2A-GFP) overexpression. **n**, Survival of iMNs in excess glutamate from three independent C9ORF72 patient lines with GFP or wild-type RAB5 (RAB5-T2A-GFP) overexpression. **o**, Survival of iMNs in excess glutamate from three independent C9ORF72 patient lines with GFP or constitutively-active RAB7 (RAB7-T2A-GFP) overexpression. **p-q**, Quantification of immunostaining of NR1 levels in C9ORF72 patient and C9ORF72<sup>+/-</sup> iMNs with or without Apilimod treatment. For (p), n=100 iMNs for DMSO and 140 iMNs for Apilimod from 4 different donor lines per genotype, two biologically independent iMN conversions per line, two-tailed t-test with Welch's correction, t-value = 8.139, degrees of freedom = 116.9. For (q), n=29 iMNs for CTRL + DMSO, 30 iMNs for CTRL + Apilimod, 36 iMNs for C9ORF72<sup>+/-</sup> + DMSO, and 32 iMNs for C9ORF72<sup>+/-</sup> + Apilimod, each from two biologically independent iMN conversions, one-way ANOVA with Tukey correction, F-value (DFn, DFd): (3, 123) = 20.55. Each grey open circle represents the number of NR1+ puncta per unit area on a single neurite (one neurite quantified per iMN). Mean +/- s.e.m. **r-s**, Quantification of immunostaining of GLUR1 levels in C9ORF72 patient and C9ORF72<sup>+/-</sup> iMNs with or without Apilimod treatment. For (r), n=100 iMNs for DMSO and 140 iMNs for Apilimod

from 4 different donor lines per genotype, two biologically independent iMN conversions per line, two-tailed t-test with Welch's correction,  $t$ -value = 8.176, degrees of freedom = 177.8. For (s),  $n=29$  iMNs for CTRL + DMSO, 30 iMNs for CTRL + Apilimod, 36 iMNs for *C9ORF72*<sup>+/-</sup> + DMSO, and 32 iMNs for *C9ORF72*<sup>+/-</sup> + Apilimod, each from two biologically independent iMN conversions, one-way ANOVA with Tukey correction,  $F$ -value (DFn, DFd): (3, 124) = 16.74. Each grey open circle represents the number of GLUR1+ puncta per unit area on a single neurite (one neurite quantified per iMN). Mean  $\pm$  s.e.m. **t**, The effect of Apilimod on iPSC-derived motor neuron local field potentials (LFP) as measured by micro-electrode array (i)(mean  $\pm$  s.d. of 2 biological replicates, two-tailed t-test). Statistical analysis was performed using a two-tailed Student's t-test for pairwise comparisons, or one-way ANOVA for multiple comparisons. For all iMN experiments,  $n=50$  iMNs per condition quantified from 3 biologically independent iMN conversions, except in (c) in which  $n=35$  and 48 for the .3  $\mu$ M and 1  $\mu$ M condition, respectively, and where indicated in (k-o). All iMN survival experiments were analyzed by a two-sided log-rank test, and statistical significance was calculated using the entire survival time course. iMN survival experiment in (c) was performed in a Nikon Biostation CT, and all others were performed in a Molecular Devices ImageExpress. For iMN survival experiments, if iMNs from more than one iPSC line were combined into one curve to improve clarity, the number of iPSC lines is indicated in the legend (each iPSC line is from a different donor).

Supplementary Figure 16. Chemical synthesis methods for Apilimod and the reduced-activity analog

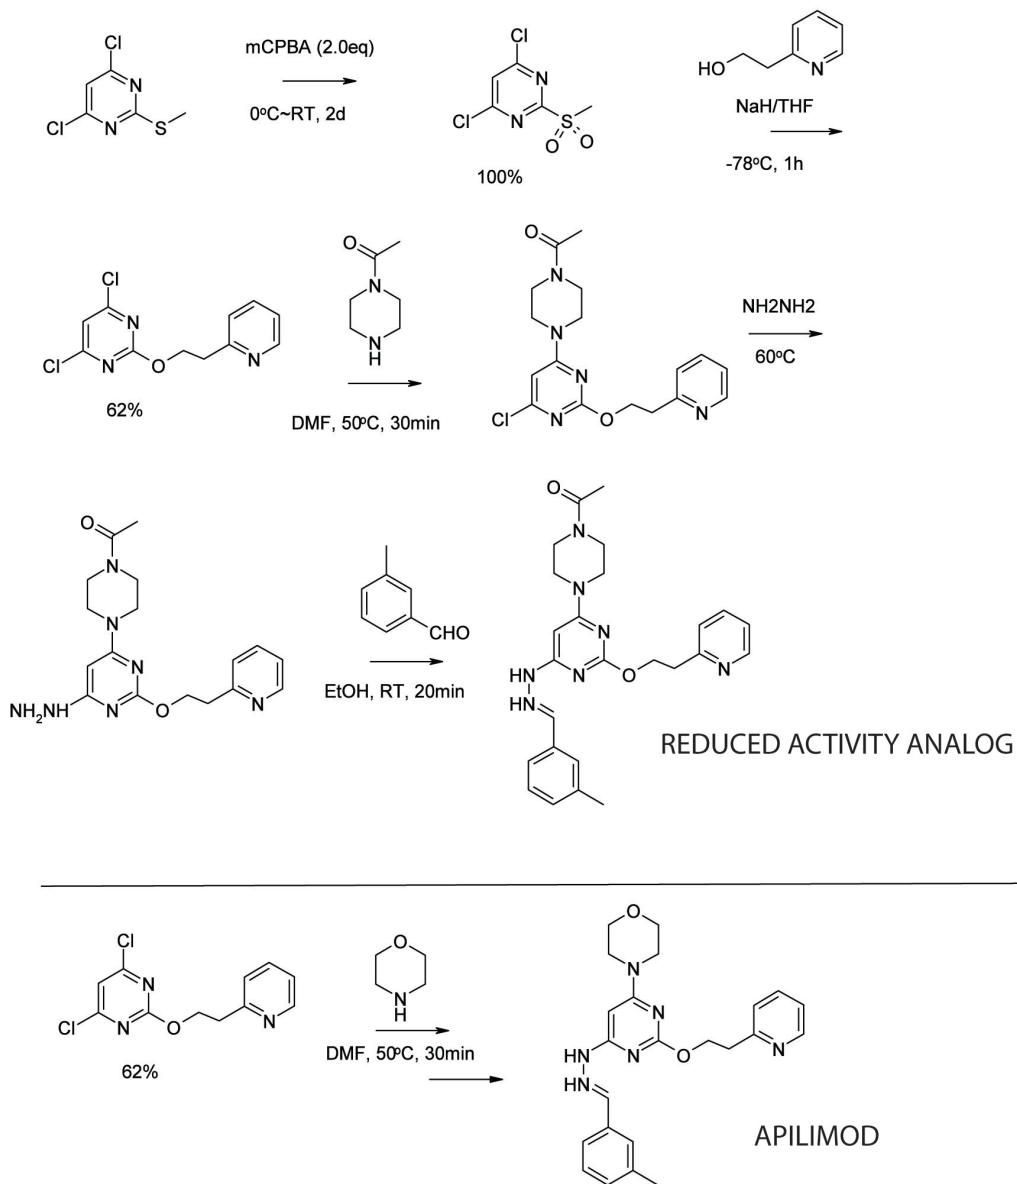

Supplementary Data Figure 16, related to Figure 6. Chemical synthesis methods for Apilimod and the reduced-activity analog.

Supplementary Figure 17. Small molecule *Pikfyve* inhibition rescues *C9orf72* disease processes *in vivo*

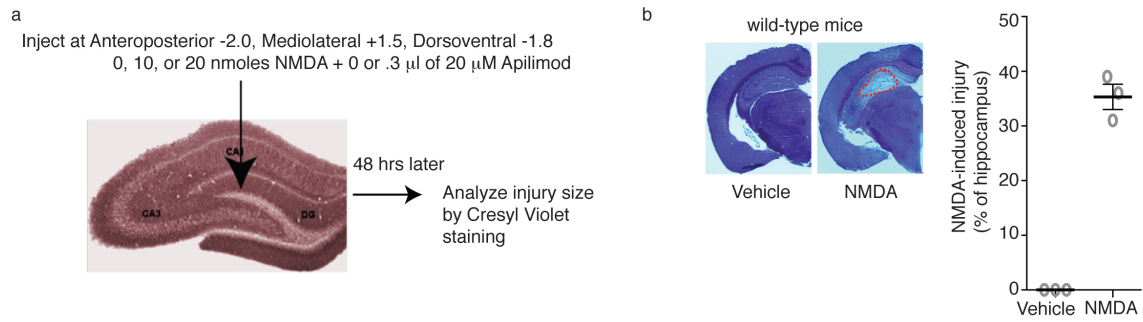

**Supplementary Data Figure 17**, related to Figure 6. Small molecule *Pikfyve* inhibition rescues *C9orf72* disease processes *in vivo*. **a**, Overview of experimental procedure for inducing NMDA-injury in the hippocampus and testing the ability of Apilimod to mitigate this injury. The same injection procedure without NMDA was used to test the effect of Apilimod on dipeptide repeat protein levels in *C9-BAC* mice. **b**, NMDA-induced injury in the mouse hippocampus. The dosage of NMDA used was 20 nmoles. Dotted line outlines the injury site. Mean  $\pm$  s.e.m.,  $n=3$  animals per condition.

**Supplementary Data Table 1. Locations of GGGGCC x 3 in the human motor neuron transcriptome.** Human motor neuron transcriptome was defined as the genes with detectable signal in three motor neuron samples from (Kiskinis, E., et al. Pathways Disrupted in Human ALS Motor Neurons Identified through Genetic Correction of Mutant SOD1. Cell Stem Cell 14, 781-795 (2014)). Samples used were GSM1314597, GSM1314598, GSM1314599 in the GSE54409 dataset in the Gene Expression Omnibus (GEO).

| <b>Number</b> | <b>Ensembl Gene/<br/>Transcript ID</b> | <b>Gene/Transcript</b> | <b>Chromosome</b>      |
|---------------|----------------------------------------|------------------------|------------------------|
| 1             | ENSG00000175130.6                      | MARCKSL1               | 1:32333832-32336379    |
| 2             | ENSG00000198035.9                      | AGAP9                  | 1:48189612:48237508    |
| 3             | ENSG00000036828.9                      | CASR                   | 3:122183683-122286503  |
| 4             | ENSG00000138685.8                      | FGF2                   | 4:122826708-122898236  |
| 5             | ENST00000264498.3                      | FGF2-001               | 4:122826708-122898236  |
| 6             | ENST00000608478.1                      | FGF2-002               | 4:122826831-122895464  |
| 7             | ENST00000517260.1                      | AC021205.1             | 4:122827014-122827090  |
| 8             | ENSG00000138756.13                     | BMP2K                  | 4:78776342-78916372    |
| 9             | ENST00000389010.3                      | BMP2K-002              | 4:78776342-78879435    |
| 10            | ENST00000502871.1                      | BMP2K-001              | 4:78776378-78879969    |
| 11            | ENST00000335016.5                      | BMP2K-201              | 4:78776378-78912185    |
| 12            | ENSG00000145214.9                      | DGKQ                   | 4:958885-986895        |
| 13            | ENST00000273814.3                      | DGKQ-001               | 4:958887-973556        |
| 14            | ENSG00000156427.7                      | FGF18                  | 5:171419656-171457623  |
| 15            | ENSG00000096433.6                      | ITPR3                  | 6:33620365-33696574    |
| 16            | ENST00000244496.5                      | RRP36                  | 6:43021645-43034156    |
| 17            | ENSG00000013374.11                     | NUB1                   | 7:151341699-151378449  |
| 18            | ENSG00000104490.13                     | NCALD                  | 8:101686543-102124907  |
| 19            | ENST00000517531.1                      | NCALD-012              | 8:101719315-102123950  |
| 20            | ENSG00000181790.6                      | BAI1                   | 8:142449430-142545009  |
| 21            | ENSG00000158856.13                     | DMTN                   | 8:22048995-22082527    |
| 22            | ENST00000522148.1                      | DMTN-012               | 8:22048995-22069056    |
| 23            | ENSG00000029534.15                     | ANK1<br>MSANTD3-       | 8:41653220-41896762    |
| 24            | ENSG00000251349.3                      | TMEFF1                 | 9:100442271-100577636  |
| 25            | ENSG00000241697.3                      | TMEFF1                 | 9:100473113-100577636  |
| 26            | ENSG00000130723.13                     | PRRC2B                 | 9:131394093-131500197  |
| 27            | ENSG00000160360.7                      | GPSM1                  | 9:136327476-136359605  |
| 28            | ENSG00000148408.8                      | CACNA1B                | 9:137877789-138124624  |
| 29            | ENSG00000147894.10                     | C9orf72                | 9:27546545-27573866    |
| 30            | ENSG00000107816.13                     | LZTS2                  | 10:100996618-101007836 |
| 31            | ENST00000370220.1                      | LZTS2                  | 10:100996618-101007836 |
| 32            | ENST00000454422.1                      | LZTS2-006              | 10:100999853-101003760 |
| 33            | ENSG00000242288.6                      | RP11-464F9.1           | 10:73674290-73730466   |
| 34            | ENSG00000183020.9                      | AP2A2                  | 11:924894-1012245      |



|    |                    |               |                        |
|----|--------------------|---------------|------------------------|
| 35 | ENSG00000198176.8  | TFDP1         | 13:113584721-113641470 |
| 36 | ENSG00000259993.1  | RP11-261B23.1 | 15:30223017-30225564   |
| 37 | ENSG00000260211.2  | RP13-395E19.2 | 15:32313126-32315654   |
| 38 | ENST00000348261.5  | CACNA1H-001   | 16:1153241-1221768     |
| 39 | ENST00000358590.4  | CACNA1H-201   | 16:1153241-1221771     |
| 40 | ENSG00000196557.6  | CACNA1H       | 16:1153241-1221771     |
| 41 | ENSG00000059145.14 | UNKL          | 16:1363205-1414751     |
| 42 | ENSG00000177548.8  | RABEP2        | 16:28904421-28936526   |
| 43 | ENST00000358201.4  | RABEP2-001    | 16:28904421-28925752   |
| 44 | ENST00000562590.1  | RABEP2-005    | 16:28910287-28925684   |
| 45 | ENSG00000007384.11 | RHBDF1        | 16:58059-76355         |
|    |                    | ARHGAP23 (by  |                        |
| 46 | ENSG00000225485.3  | BLAST)        | 17:38428418-38512392   |
| 47 | ENSG00000267131.1  | RP11-332H18.5 | 17:61361668-61400243   |
| 48 | ENSG00000267280.1  | TBX2-AS1      | 17:61393456-61411555   |
| 49 | ENSG00000007314.7  | SCN4A         | 17:63938554-63972918   |
| 50 | ENSG00000007237.14 | GAS7          | 17:9910609-10198551    |
| 51 | ENSG00000172466.11 | ZNF24         | 18:35332212-35345482   |
| 52 | ENST00000589539.1  | ZNF24-005     | 18:35340345-35343932   |
| 53 | ENSG00000134046.7  | MBD2          | 18:54151601-54224788   |
| 54 | ENST00000256429.3  | MBD2-001      | 18:54151601-54224788   |
| 55 | ENST00000398398.2  | MBD2-005      | 18:54202680-54224647   |
| 56 | ENST00000583046.1  | MBD2-002      | 18:54202681-54224617   |
| 57 | ENSG00000101493.6  | ZNF516        | 18:76358190-76495190   |
| 58 | ENST00000353265.3  | PARD6G-001    | 18:80157232-80247546   |
| 59 | ENSG00000178184.11 | PARD6G        | 18:80157232-80247546   |
| 60 | ENSG00000267662.1  | AC007796.1    | 19:31348881-31417794   |
| 61 | ENSG00000104936.13 | DMPK          | 19:45769717-45782552   |
| 62 | ENSG00000196562.10 | SULF2         | 20:47656348-47786616   |
| 63 | ENST00000359930.4  | SULF2-001     | 20:47656912-47786586   |
| 64 | ENST00000463221.2  | SULF2-008     | 20:47689548-47786054   |
| 65 | ENSG00000198355.4  | PIM3          | 22:49960513-49964080   |
| 66 | ENST00000467480.1  | PIM3-002      | 22:49960768-49961646   |
| 67 | ENST00000375135.3  | FGD1          | X:54445454-54496166    |
| 68 | ENSG00000102302.7  | FGD1          | X:54445454-54496166    |

**Supplementary Data Table 2. Locations of GGGGCC x 4 in the human motor neuron transcriptome.** Human motor neuron transcriptome was defined as the genes with detectable signal in three motor neuron samples (GSM1314597, GSM1314598, GSM1314599) in the GSE54409 dataset in the Gene Expression Omnibus (GEO).

|    | <b>Ensembl Gene/<br/>Transcript ID</b> | <b>Gene/Transcript</b> | <b>Chromosome</b>     |
|----|----------------------------------------|------------------------|-----------------------|
| 1  | ENSG00000235016.1                      | SEMA3F-AS1             | 3:50116022-50156085   |
| 2  | ENSG00000109794.9                      | FAM149A                | 4:186104419-186172667 |
| 3  | ENSG00000169220.13                     | RGS14                  | 5:177357837-177372601 |
| 4  | ENST00000509289.1                      | RGS14-011              | 5:177371066-177371582 |
| 5  | ENST00000244496.5                      | RRP36-001              | 6:43021645-43029597   |
| 6  | ENSG00000124541.6                      | RRP36                  | 6:43021645-43034156   |
| 7  | ENSG00000179526.12                     | SHARPIN                | 8:144098633-144108124 |
| 8  | ENSG00000167157.9                      | PRRX2                  | 9:129665641-129722674 |
| 9  | ENSG00000204172.7                      | AGAP10                 | 10:47501854-47549750  |
| 10 | ENSG00000254929.2                      | RP11-144G6.12          | 10:47517816-47553514  |
| 11 | ENSG00000198035.9                      | AGAP9                  | 10:48189612-48237508  |
| 12 | ENSG00000204164.6                      | BMS1P5                 | 10:48901102-48950972  |
| 13 | ENSG00000255032.1                      | RP11-45A12.2           | 11:44719392-44736692  |
| 14 | ENSG00000248265.1                      | FLJ12825               | 12:54058254-54122234  |
| 15 | ENSG00000249388.1                      | RP11-834C11.6          | 12:54082118-54102693  |
| 16 | ENSG00000140265.8                      | ZSCAN29                | 15:43358172-43371025  |
| 17 | ENST00000561661.1                      | ZSCAN29-006            | 15:43369851-43371025  |
| 18 | ENSG00000007545.11                     | CRAMP1L                | 16:1612325-1677908    |
| 19 | ENSG00000099822.2                      | HCN2                   | 19:589893-617159      |
| 20 | ENSG00000175221.10                     | MED16                  | 19:867630-893218      |

**Supplementary Data Table 3. Control and Patient sample information.** The C9-ALS/FTD lines used in the study possessed repeat expansions of ~1000-4000 base pairs.

| <b>NINDS/<br/>Coriell<br/>Code</b> | <b>Sample<br/>name</b> | <b>Mutation</b> | <b>Disease</b> | <b>Age of<br/>Onset</b> | <b>Age at<br/>sampling</b> | <b>Gender</b> | <b>iPSC karyo-<br/>type</b>                    |
|------------------------------------|------------------------|-----------------|----------------|-------------------------|----------------------------|---------------|------------------------------------------------|
| ND12133                            | control 1              | control         | N/A            | N/A                     | 43                         | F             | 46,XX,t(5;12)<br>(q31.1;q22)[20]               |
| ND03231                            | control 2              | control         | N/A            | N/A                     | 56                         | M             | normal                                         |
| ND11976                            | control 3              | control         | N/A            | N/A                     | 40                         | M             | normal                                         |
| ND03719                            | control 4              | control         | N/A            | N/A                     | 33                         | M             | normal                                         |
| ND00184                            | control 5              | control         | N/A            | N/A                     | 65                         | F             | normal                                         |
| ND05280                            | control 6              | control         | N/A            | N/A                     | 72                         | F             | normal                                         |
| ND06769                            | patient 1              | C9ORF72         | ALS/FTD        | 45                      | 46                         | F             | normal                                         |
| ND10689                            | patient 2              | C9ORF72         | ALS/FTD        | 49                      | 51                         | F             | normal                                         |
| ND12099                            | patient 3              | C9ORF72         | ALS/FTD        | 48                      | 49                         | M             | normal                                         |
| ND14954                            | patient 4              | C9ORF72         | ALS/FTD        | 73                      | 74                         | M             | 46,XY,der(18)<br>t(12;18)(p11.2;q2<br>1.1)[20] |
| ND08957                            | patient 5              | C9ORF72         | ALS/FTD        | 46                      | 48                         | M             | normal                                         |
| ND12100                            | patient 6              | C9ORF72         | ALS/FTD        | 55                      | 56                         | M             | normal                                         |
| ND14587                            | SOD1A4V                | SOD1A4V         | ALS            | 46                      | 46                         | F             | normal                                         |

**Supplementary Data Table 4. Primers, probes and single guide RNAs (sgRNAs) used in this study.**

|                                                                        |                                                               |
|------------------------------------------------------------------------|---------------------------------------------------------------|
| RP-PCR primer, Forward                                                 | 5'- 6FAM-TGTAACACGACGGCCAGTCAAGGA<br>GGGAAACAACCGCAGCC        |
| RP-PCR primer, Reverse-1                                               | 5'- CAGGAAACAGCTATGACC                                        |
| RP-PCR primer, Reverse-2                                               | 5'-CAGGAAACAGCTATGACCGGGCCCGCC<br>CCGACCACGCCCCGGCCCCGGCCCCGG |
| Primer for generating Southern probe, Forward                          | 5'- AGAACAGGACAAGTTGCC                                        |
| Primer for generating Southern probe, Reverse                          | 5'- AACACACACCTCCTAAACC                                       |
| Genotyping primers for <i>C9ORF72</i> exon 2, Forward                  | 5'- GGATTCCACATCTTTGACTTAAGAGG                                |
| Genotyping primers for <i>C9ORF72</i> exon 2, Reverse                  | 5'- ATGTGGAGCTACCATTTCGTACCT                                  |
| qRT-PCR primer for <i>C9ORF72</i> , transcriptional variant 2 Forward  | 5'- GTGGCGAGTGGATATCTCCGGA                                    |
| qRT-PCR primer for <i>C9ORF72</i> , transcriptional variants 2 Reverse | 5'- TGGAGCCCAAATGTGCCTTACTC                                   |
| qRT-PCR primer for <i>GAPDH</i> , Forward                              | 5'- CGAGATCCCTCCAAAATCAA                                      |
| qRT-PCR primer for <i>GAPDH</i> , Reverse                              | 5'- GTCTTCTGGGTGGCAGTGAT                                      |
| qRT-PCR primer for <i>GRIN1</i> , Forward                              | 5'- CCAGCGTGTGGTTTGAGATG                                      |
| qRT-PCR primer for <i>GRIN1</i> , Reverse                              | 5'- TTCTCTGCCTTGGACTCACG                                      |
| qRT-PCR primer for <i>GRI1</i> , Forward                               | 5'- ATTCCAAGGACAAGACAAGCG                                     |
| qRT-PCR primer for <i>GRI1</i> , Reverse                               | 5'- CCGCTTGGATTCACTACGGG                                      |
| qRT-PCR primer for <i>PIKFYVE</i> , Forward                            | 5'- CGTCCCCAACACTGGACTCTGC                                    |
| qRT-PCR primer for <i>PIKFYVE</i> , Reverse                            | 5'- CCCTGGCCTCCTTCTGCTCTCTC                                   |
| sgRNA-3 targeting <i>C9ORF72</i> exon 2                                | 5'- UUAACACAUAUAAUCCGGAA                                      |

sgRNA-4 targeting *C9ORF72*  
exon 2

5'- CACCACUCUCUGCAUUUCGA

sgRNA targeting *AAVSI* locus

5'- GGGGCCACTAGGGACAGGATTGG

FOR ASOs, m = 2'OMe, \*-  
phosphorothioate linkage

*C9ORF72* ASO 1

mG\*mC\*mC\*mA\*mT\*G\*A\*T\*T\*T\*C\*T\*T\*G\*T\*  
mC\*mT\*mG\*mG\*mG

*C9ORF72* ASO 2

mG\*mG\*mG\*mA\*mC\*A\*C\*U\*A\*C\*A\*A\*G\*G\*U\*  
mA\*mG\*mU\*mA\*mU

*PIKFYVE* ASO 1

mU\*mG\*mG\*mC\*mC\*T\*C\*C\*T\*T\*C\*T\*G\*C\*T\*  
mC\*mU\*mC\*mU\*mC

*PIKFYVE* ASO 2

mG\*mC\*mU\*mG\*mG\*T\*C\*C\*A\*A\*C\*T\*T\*C\*C\*  
mA\*mC\*mU\*mC\*mA

**Supplementary Data Table 5. Numbers of iMNs counted for each line for survival experiments.**

| <b>Figures</b>   | <b>Main Figures<br/>Line</b> | <b>Number of Neurons<br/>Tracked</b> |
|------------------|------------------------------|--------------------------------------|
| <b>Figure 1b</b> | CTRL1                        | 50                                   |
|                  | CTRL2                        | 50                                   |
|                  | C9-ALS1                      | 50                                   |
|                  | C9-ALS2                      | 50                                   |
|                  | C9-ALS3                      | 50                                   |
| <b>Figure 1c</b> | CTRL1                        | 50                                   |
|                  | CTRL2                        | 50                                   |
|                  | C9-ALS1                      | 50                                   |
|                  | C9-ALS2                      | 50                                   |
|                  | C9-ALS3                      | 50                                   |
| <b>Figure 1f</b> | CTRL1                        | 50                                   |
|                  | CTRL2                        | 50                                   |
|                  | C9-ALS1                      | 50                                   |
|                  | C9-ALS2                      | 50                                   |
|                  | C9-ALS3                      | 50                                   |
| <b>Figure 1g</b> | CTRL1                        | 50                                   |
|                  | CTRL2                        | 50                                   |
|                  | C9-ALS1                      | 50                                   |
|                  | C9-ALS2                      | 50                                   |
|                  | C9-ALS3                      | 50                                   |
| <b>Figure 1h</b> | CTRL1                        | 50                                   |
|                  | CTRL2                        | 50                                   |
|                  | C9-ALS1                      | 50                                   |
|                  | C9-ALS2                      | 50                                   |
|                  | C9-ALS3                      | 50                                   |
| <b>Figure 2b</b> | CTRL1+eGFP                   | 50                                   |
|                  | CTRL2+eGFP                   | 50                                   |
|                  | C9-ALS1+eGFP                 | 50                                   |
|                  | C9-ALS1+isoA                 | 50                                   |
|                  | C9-ALS1+isoB                 | 50                                   |
|                  | C9-ALS2+eGFP                 | 50                                   |
|                  | C9-ALS2+isoA                 | 50                                   |
|                  | C9-ALS2+isoB                 | 50                                   |
|                  | C9-ALS3+eGFP                 | 50                                   |
|                  | C9-ALS3+isoA                 | 50                                   |
| C9-ALS3+isoB     | 50                           |                                      |
| <b>Figure 2c</b> | SOD1-ALS+eGFP                | 50                                   |
|                  | SOD1-ALS+isoA                | 50                                   |
|                  | SOD1-ALS+isoB                | 50                                   |
| <b>Figure 2d</b> | CTRL1+eGFP                   | 50                                   |
|                  | CTRL1+isoA                   | 50                                   |
|                  | CTRL1+isoB                   | 50                                   |

|                   |                                 |    |
|-------------------|---------------------------------|----|
|                   | CTRL2+eGFP                      | 50 |
|                   | CTRL2+isoA                      | 50 |
|                   | CTRL2+isoB                      | 50 |
| <b>Figure 2f</b>  | CTRL2+eGFP                      | 50 |
|                   | CTRL2 C9+/-+eGFP                | 50 |
|                   | CTRL2 C9 -/-+eGFP               | 50 |
|                   | C9-ALS1+eGFP                    | 50 |
|                   | C9-ALS2+eGFP                    | 50 |
| <b>Figure 2g</b>  | CTRL1+eGFP                      | 50 |
|                   | CTRL1+isoA                      | 50 |
|                   | CTRL1+isoB                      | 50 |
|                   | CTRL2+eGFP                      | 50 |
|                   | CTRL2+isoA                      | 50 |
|                   | CTRL2+isoB                      | 50 |
| <b>Figure 5a</b>  | CTRL1+eGFP                      | 50 |
|                   | CTRL1+PR                        | 50 |
|                   | CTRL2 C9+/- +eGFP               | 49 |
|                   | CTRL2 C9+/- +PR                 | 47 |
| <b>Figure 5b</b>  | CTRL1+eGFP                      | 50 |
|                   | CTRL1+GR                        | 50 |
|                   | CTRL2 C9+/- +eGFP               | 49 |
|                   | CTRL2 C9+/- +GR                 | 40 |
| <b>Figure 5c</b>  | CTRL1+eGFP                      | 50 |
|                   | CTRL1+PR                        | 50 |
|                   | C9-ALS1+eGFP                    | 50 |
|                   | C9-ALS1+PR                      | 42 |
|                   | C9-ALS2+eGFP                    | 50 |
|                   | C9-ALS2+PR                      | 40 |
| <b>Figure 5d</b>  | CTRL1+eGFP                      | 50 |
|                   | CTRL1+GR                        | 50 |
|                   | C9-ALS1+eGFP                    | 50 |
|                   | C9-ALS1+GR                      | 48 |
|                   | C9-ALS2+eGFP                    | 50 |
|                   | C9-ALS2+GR                      | 45 |
| <b>Figure 6d</b>  | C9-ALS2+DMSO                    | 50 |
|                   | C9-ALS2+Apilimod                | 50 |
|                   | C9-ALS2+reduced-activity analog | 50 |
| <b>Figure 6e</b>  | Scrambled ASO                   | 50 |
|                   | <i>PIKFYVE</i> ASO 1            | 50 |
|                   | <i>PIKFYVE</i> ASO 2            | 50 |
|                   | <b>Supplementary Figures</b>    |    |
| <b>Supp Fig3a</b> | CTRL1                           | 34 |
|                   | CTRL2                           | 50 |
|                   | C9-ALS1                         | 50 |
|                   | C9-ALS2                         | 50 |

|                   |                   |       |    |
|-------------------|-------------------|-------|----|
|                   | C9-ALS3           | 50    |    |
| <b>Supp Fig3b</b> | CTRL1             | 50    |    |
|                   | CTRL2             | 50    |    |
|                   | C9-ALS1           | 50    |    |
| <b>Supp Fig3c</b> | C9-ALS2           | 50    |    |
|                   | C9-ALS3, Clone1   | 50    |    |
|                   | C9-ALS3, Clone2   | 50    |    |
| <b>Supp Fig3d</b> | CTRL1             | 50    |    |
|                   | CTRL2             | 50    |    |
|                   | C9-ALS1           | 50    |    |
|                   | C9-ALS2           | 50    |    |
| <b>Supp Fig3e</b> | C9-ALS3           | 50    |    |
|                   | CTRL1             | 50    |    |
|                   | CTRL2             | 50    |    |
|                   | CTRL3             | 50    |    |
|                   | CTRL4             | 50    |    |
|                   | C9-ALS4           | 50    |    |
|                   | C9-ALS5           | 31    |    |
|                   | C9-ALS6           | 40    |    |
|                   | <b>Supp Fig3f</b> | CTRL1 | 50 |
|                   |                   | CTRL2 | 50 |
| C9-ALS1           |                   | 50    |    |
| C9-ALS2           |                   | 50    |    |
| <b>Supp Fig3i</b> | C9-ALS3           | 50    |    |
|                   | CTRL1             | 1075  |    |
|                   | CTRL2             | 1075  |    |
|                   | CTRL3             | 1075  |    |
|                   | CTRL4             | 1075  |    |
|                   | C9-ALS1           | 1075  |    |
|                   | C9-ALS2           | 1075  |    |
|                   | C9-ALS3           | 1075  |    |
| C9-ALS4           | 1075              |       |    |
| <b>Supp Fig3j</b> | CTRL2             | 100   |    |
|                   | CTRL2 C9+/-       | 100   |    |
|                   | CTRL2 C9-/-       | 100   |    |
| <b>Supp Fig3k</b> | CTRL1             | 1075  |    |
|                   | CTRL2             | 1075  |    |
|                   | CTRL3             | 1075  |    |
|                   | CTRL4             | 1075  |    |
|                   | C9-ALS1           | 1075  |    |
|                   | C9-ALS2           | 1075  |    |
|                   | C9-ALS3           | 1075  |    |
|                   | C9-ALS4           | 1075  |    |
| <b>Supp Fig3l</b> | CTRL2             | 100   |    |
|                   | CTRL2 C9+/-       | 100   |    |
|                   | CTRL2 C9-/-       | 100   |    |



|                    |                           |    |
|--------------------|---------------------------|----|
| <b>Supp Fig3o</b>  | CTRL1-iDA                 | 50 |
|                    | CTRL2-iDA                 | 50 |
|                    | C9-ALS2-iDA               | 50 |
|                    | C9-ALS3-iDA               | 50 |
| <b>Supp Fig4c</b>  | C9-ALS1+eGFP              | 50 |
|                    | C9-ALS1+isoA              | 50 |
|                    | C9-ALS1+isoB              | 50 |
|                    | C9-ALS2+eGFP              | 50 |
|                    | C9-ALS2+isoA              | 50 |
|                    | C9-ALS2+isoB              | 50 |
|                    | C9-ALS3+eGFP              | 50 |
|                    | C9-ALS3+isoA              | 50 |
|                    | C9-ALS3+isoB              | 50 |
| <b>Supp Fig4d</b>  | CTRL1+eGFP                | 50 |
|                    | CTRL1+isoA                | 50 |
|                    | CTRL1+isoB                | 50 |
|                    | CTRL2+eGFP                | 50 |
|                    | CTRL2+isoA                | 50 |
|                    | CTRL2+isoB                | 50 |
| <b>Supp Fig4k</b>  | CTRL2+eGFP                | 50 |
|                    | CTRL2 C9+/- +eGFP         | 50 |
|                    | CTRL2 C9+/- +isoA         | 50 |
|                    | CTRL2 C9+/- +isoB         | 50 |
| <b>Supp Fig4l</b>  | CTRL2+eGFP                | 50 |
|                    | CTRL2 C9-/- +eGFP         | 50 |
|                    | CTRL2 C9-/- +isoA         | 50 |
|                    | CTRL2 C9-/- +isoB         | 50 |
| <b>Supp Fig13e</b> | CTRL2+DMSO                | 50 |
|                    | CTRL2+Retigabine          | 50 |
| <b>Supp fig13f</b> | CTRL2 C9+/- +DMSO         | 50 |
|                    | CTRL2 C9+/- +Retigabine   | 50 |
| <b>Supp fig13g</b> | CTRL2 C9-/- +DMSO         | 50 |
|                    | CTRL2 C9-/- +Retigabine   | 50 |
| <b>Supp fig14a</b> | CTRL1+eGFP                | 50 |
|                    | CTRL1+PR(50)-eGFP         | 50 |
|                    | CTRL2 C9-/- +eGFP         | 50 |
|                    | CTRL2 C9-/- + PR(50)-eGFP | 44 |
| <b>Supp fig14b</b> | CTRL1+eGFP                | 50 |
|                    | CTRL1+GR(50)-eGFP         | 50 |
|                    | CTRL2 C9-/- +eGFP         | 39 |
|                    | CTRL2 C9-/- + GR(50)-eGFP | 44 |
| <b>Supp fig15a</b> | C9-ALS1+DMSO              | 50 |
|                    | C9-ALS1-YM201636          | 50 |
|                    | C9-ALS2+DMSO              | 50 |
|                    | C9-ALS2-YM201636          | 50 |
| <b>Supp fig15c</b> | CTRL2+0.3 $\mu$ M DMSO    | 50 |

|                    |                              |     |
|--------------------|------------------------------|-----|
|                    | C9-ALS2+0.3 $\mu$ M DMSO     | 50  |
|                    | C9-ALS2+0.3 $\mu$ M YM201636 | 35  |
|                    | C9-ALS2+1 $\mu$ M YM201636   | 48  |
|                    | C9-ALS2+10 $\mu$ M YM201636  | 50  |
| <b>Supp fig15f</b> | C9-ALS1+DMSO                 | 45  |
|                    | C9-ALS1+1 $\mu$ M Apilimod   | 50  |
|                    | C9-ALS2+DMSO                 | 50  |
|                    | C9-ALS2-1 $\mu$ M Apilimod   | 50  |
|                    | C9-ALS3+DMSO                 | 50  |
|                    | C9-ALS3+1 $\mu$ M Apilimod   | 50  |
|                    | C9-ALS4+DMSO                 | 50  |
|                    | C9-ALS4+1 $\mu$ M Apilimod   | 50  |
| <b>Supp fig15g</b> | CTRL1+DMSO                   | 50  |
|                    | CTRL1+1 $\mu$ M Apilimod     | 50  |
|                    | CTRL3+DMSO                   | 50  |
|                    | CTRL3+1 $\mu$ M Apilimod     | 50  |
|                    | CTRL4+DMSO                   | 50  |
|                    | CTRL4+1 $\mu$ M Apilimod     | 50  |
| <b>Supp fig15h</b> | C9-ALS2+DMSO                 | 486 |
|                    | C9-ALS2+1 $\mu$ M Apilimod   | 817 |
| <b>Supp fig15k</b> | CTRL1+eGFP                   | 50  |
|                    | CTRL1+RAB5-CA                | 50  |
|                    | CTRL2+eGFP                   | 50  |
|                    | CTRL2+RAB5-CA                | 34  |
| <b>Supp fig15l</b> | C9-ALS2+eGFP                 | 35  |
|                    | C9-ALS2+RAB5-CA              | 37  |
|                    | C9-ALS3+eGFP                 | 50  |
|                    | C9-ALS3+RAB5-CA              | 50  |
| <b>Supp fig15m</b> | C9-ALS1+eGFP                 | 31  |
|                    | C9-ALS1+RAB5-DN              | 42  |
| <b>Supp fig15n</b> | C9-ALS1+eGFP                 | 32  |
|                    | C9-ALS1+RAB5-WT              | 50  |
|                    | C9-ALS2+eGFP                 | 22  |
|                    | C9-ALS2+RAB5-WT              | 24  |
|                    | C9-ALS3+eGFP                 | 50  |
|                    | C9-ALS3+RAB5-WT              | 38  |
|                    | C9-ALS1+eGFP                 | 32  |
| <b>Supp fig15o</b> | C9-ALS1+RAB7-CA              | 49  |
|                    | C9-ALS2+eGFP                 | 22  |
|                    | C9-ALS2+RAB7-CA              | 31  |
|                    | C9-ALS3+eGFP                 | 50  |
|                    | C9-ALS3+RAB7-CA              | 50  |

**Supplementary Data Table 6. Live imager used for each iMN survival experiment.**

| <b>Figure No</b>                        | <b>Machine Used for Live Imaging</b> |
|-----------------------------------------|--------------------------------------|
| 1b                                      | BS (Nikon Biostation CT)             |
| 1c                                      | BS                                   |
| 1d                                      | BS                                   |
| 1f                                      | BS                                   |
| 1g                                      | BS                                   |
| 1h                                      | MD (Molecular Devices ImageExpress)  |
| 2b                                      | BS                                   |
| 2c                                      | MD                                   |
| 2d                                      | BS                                   |
| 2f                                      | MD                                   |
| 2g                                      | BS                                   |
| 5a                                      | MD                                   |
| 5b                                      | MD                                   |
| 5c                                      | MD                                   |
| 5d                                      | MD                                   |
| 6d                                      | MD                                   |
| 6e                                      | MD                                   |
| Supp Fig3a                              | BS                                   |
| Supp Fig3b                              | MD                                   |
| Supp Fig3c                              | MD                                   |
| Supp Fig3d                              | BS                                   |
| Supp Fig3e                              | BS                                   |
| Supp Fig3f                              | BS                                   |
| Supp Fig3i                              | MD                                   |
| Supp Fig3j                              | MD                                   |
| Supp Fig3k                              | MD                                   |
| Supp Fig3l                              | MD                                   |
| Supp Fig3o                              | MD                                   |
| Supp Fig4c                              | BS                                   |
| Supp Fig4d                              | BS                                   |
| Supp Fig4k                              | MD                                   |
| Supp Fig4l                              | MD                                   |
| Supp Fig13e                             | MD                                   |
| Supp Fig13f                             | MD                                   |
| Supp Fig13g                             | MD                                   |
| Supp Fig14a                             | MD                                   |
| Supp Fig14b                             | MD                                   |
| Supp Fig15a                             | MD                                   |
| Supp Fig15c                             | BS                                   |
| Supp Fig15f BS for C9-ALS1,2 MD for C9- |                                      |

|             |    |
|-------------|----|
| ALS3,4      |    |
| Supp Fig15g | MD |
| Supp Fig15k | MD |
| Supp Fig15l | MD |

|             |    |
|-------------|----|
| Supp Fig15m | MD |
| Supp Fig15n | MD |
| Supp Fig15o | MD |
